# Supplementary material for: GWAS identifies a wheat orthologue of the rice D11 gene as an important contributor to grain size in an international collection of hexaploid wheat
Source: Research Square preprint supplement (doi:10.21203/rs.3.rs-244194/v1), 2021-03-02
Supplement: Supplementary file 1 [file c0a579e2d416d6c6eb24f33e.xlsx]

## Sheet: Chr2D_HighConfGenes -GO ann
GWAS identifies a wheat orthologue of the rice D11 gene as an important contributor to grain size in an international collection of hexaploid wheat Honoré Tekeu1,2,5, Eddy L.M. Ngonkeu4,5, Sébastien Bélanger2,3, Pierre F. Djocgoué5, Amina Abed1,2, Davoud Torkamaneh1,2,6, Brian Boyle2, Patrick Tsimi5, Wuletaw Tadesse7, Martine Jean1,2, François Belzile1,2* 1Département de Phytologie, Université La…
Chrom	Genome ref	Element	Pos start	Pos end	Seq			ID/Name
chr2D	IWGSC_v1.1_201706	gene	404037833	404045046	60	+	.	_Previous_id=TraesCS2D01G314200;Name=TraesCS2D02G314200;_Primconf=HC;_Go=GO:0009507,GO:0016301,GO:0016310,GO:0019752,GO:0044238,GO:0050896,GO:0065007;ID=TraesCS2D02G314200
chr2D	IWGSC_v1.1_201706	gene	404085942	404092716	51	+	.	_Previous_id=TraesCS2D01G314300;Name=TraesCS2D02G314300;_Primconf=HC;_Go=GO:0009507,GO:0016301,GO:0016310,GO:0032787,GO:0042180,GO:0042221,GO:0044255,GO:0050794;ID=TraesCS2D02G314300
chr2D	IWGSC_v1.1_201706	gene	404099173	404100522	60	+	.	_Previous_id=TraesCS2D01G314400;Name=TraesCS2D02G314400;_Primconf=HC;_Go=GO:0004190,GO:0005576,GO:0005840,GO:0016021,GO:0006508,GO:0044237,GO:0008152;ID=TraesCS2D02G314400
chr2D	IWGSC_v1.1_201706	gene	404119907	404122032	60	+	.	_Previous_id=TraesCS2D01G314500;Name=TraesCS2D02G314500;_Primconf=HC;_Go=GO:0004190,GO:0005576,GO:0016021,GO:0006508,GO:0006950,GO:0009056,GO:0044237,GO:0008152;ID=TraesCS2D02G314500
chr2D	IWGSC_v1.1_201706	gene	404121727	404124307	62	-	.	_Previous_id=TraesCS2D01G314600;Name=TraesCS2D02G314600;_Primconf=HC;_Go=GO:0003839,GO:0005634,GO:0005794,GO:0005829,GO:0016020,GO:0044422,GO:0006751;ID=TraesCS2D02G314600
chr2D	IWGSC_v1.1_201706	gene	404124866	404127586	62	-	.	_Previous_id=TraesCS2D01G314700;Name=TraesCS2D02G314700;_Primconf=HC;_Go=GO:0005634,GO:0016021,GO:0019005,GO:0009737,GO:0010608,GO:0010629,GO:0016567,GO:0008152,GO:0016874;ID=TraesCS2D02G314700
chr2D	IWGSC_v1.1_201706	gene	404379643	404384379	62	+	.	_Previous_id=TraesCS2D01G314800;Name=TraesCS2D02G314800;_Primconf=HC;_Go=GO:0004364,GO:0022857,GO:0044877,GO:0005618,GO:0005739,GO:0005774,GO:0005886,GO:0009507,GO:0016021,GO:0006098,GO:0006740,GO:0006810,GO:0009651,GO:0009723;ID=TraesCS2D02G314800
chr2D	IWGSC_v1.1_201706	gene	404387472	404394532	62	+	.	_Previous_id=TraesCS2D01G314900;Name=TraesCS2D02G314900;_Primconf=HC;_Go=GO:0006733,GO:0006970,GO:0009408,GO:0009414,GO:0009688,GO:0009737,GO:0010114,GO:0010182,GO:0010264,GO:0016123,GO:0042180,GO:0050891,GO:0055086,GO:0055114,GO:0009535,GO:0031969,GO:0009540,GO:0052662,GO:0052663,GO:0071949;ID=TraesCS2D02G314900
chr2D	IWGSC_v1.1_201706	gene	404395087	404397591	62	+	.	_Previous_id=TraesCS2D01G315000;Name=TraesCS2D02G315000;_Primconf=HC;_Go=GO:0022857,GO:0005743,GO:0016021,GO:0006839,GO:0009409,GO:0044237,GO:0046907,GO:0051881,GO:0055085;ID=TraesCS2D02G315000
chr2D	IWGSC_v1.1_201706	gene	404398871	404403712	58	-	.	_Previous_id=TraesCS2D01G315100;Name=TraesCS2D02G315100;_Primconf=HC;_Go=GO:0004722,GO:0005488,GO:0005829,GO:0005886,GO:0006470,GO:0006950,GO:0007165,GO:0043687;ID=TraesCS2D02G315100
chr2D	IWGSC_v1.1_201706	gene	404794302	404799102	62	-	.	_Previous_id=TraesCS2D01G315200;Name=TraesCS2D02G315200;_Primconf=HC;_Go=GO:0003707,GO:0046872,GO:0070006,GO:0005634,GO:0005886,GO:0016021,GO:0006355,GO:0006807,GO:0010228,GO:0043401,GO:0044237,GO:0044238,GO:0022414,GO:0048522;ID=TraesCS2D02G315200
chr2D	IWGSC_v1.1_201706	gene	404888999	404890319	50	+	.	_Previous_id=TraesCS2D01G315300;Name=TraesCS2D02G315300;_Primconf=HC;_Go=GO:0000003,GO:0009913,GO:0042221,GO:0044238,GO:0048513,GO:0048518,GO:0048646,GO:0048765,GO:0050794,GO:0051716,GO:0005829,GO:0050253,GO:0080030,GO:0080031,GO:0080032;ID=TraesCS2D02G315300
chr2D	IWGSC_v1.1_201706	gene	405062108	405066092	56	+	.	_Previous_id=TraesCS2D01G315400;Name=TraesCS2D02G315400;_Primconf=HC;_Go=GO:0000166,GO:0003729,GO:0008143,GO:0005634,GO:0005829,GO:0010494,GO:0006397,GO:0009735,GO:0034605,GO:0050789;ID=TraesCS2D02G315400
chr2D	IWGSC_v1.1_201706	gene	405073191	405074532	55	+	.	_Previous_id=TraesCS2D01G315500;Name=TraesCS2D02G315500;_Primconf=HC;_Go=GO:0004386,GO:0008270,GO:0016021,GO:0032501,GO:0032502,GO:0034641,GO:0044238,GO:0044260,GO:0050794;ID=TraesCS2D02G315500
chr2D	IWGSC_v1.1_201706	gene	405179467	405182059	61	+	.	_Previous_id=TraesCS2D01G315600;Name=TraesCS2D02G315600;_Primconf=HC;_Go=GO:0005509,GO:0016645,GO:0016787,GO:0005634,GO:0005777,GO:0016021,GO:0006629,GO:0044237,GO:0055114,GO:0065007;ID=TraesCS2D02G315600
chr2D	IWGSC_v1.1_201706	gene	405272115	405274808	62	+	.	_Derived_from=TraesCS2D01G315700,PPRFinder_492;Name=TraesCS2D02G315700;_Primconf=HC;_Go=GO:0003723,GO:0004519,GO:0005739,GO:0009507,GO:0006302,GO:0006312,GO:0006364,GO:0006626,GO:0007062,GO:0007129,GO:0007131,GO:0009451,GO:0009560,GO:0009658,GO:0019288,GO:0042138,GO:0044743,GO:0045036,GO:0051327;_Curating_team=IWGSC_steinn;_Manually_curated=yes;ID=TraesCS2D02G315700
chr2D	IWGSC_v1.1_201706	gene	405275467	405276946	54	+	.	_Previous_id=TraesCS2D01G315800;Name=TraesCS2D02G315800;_Primconf=HC;_Go=GO:0002679,GO:0006984,GO:0009414,GO:0009611,GO:0009693,GO:0009723,GO:0009733,GO:0009738,GO:0009743,GO:0009753,GO:0009816,GO:0010200,GO:0016567,GO:0030968,GO:0035556,GO:0042538,GO:0043161,GO:0043562,GO:0051704,GO:0005622,GO:0005886,GO:0016021,GO:0008270,GO:0061630;ID=TraesCS2D02G315800
chr2D	IWGSC_v1.1_201706	gene	405399410	405401093	60	-	.	_Previous_id=TraesCS2D01G315900;Name=TraesCS2D02G315900;_Primconf=HC;_Go=GO:0008270,GO:0016021,GO:0016567,GO:0043161,GO:0050896,GO:0065007;ID=TraesCS2D02G315900
chr2D	IWGSC_v1.1_201706	gene	405405558	405409289	56	+	.	_Previous_id=TraesCS2D01G316000;Name=TraesCS2D02G316000;_Primconf=HC;_Go=GO:0000291,GO:0006281,GO:0009059,GO:0032502,GO:0044249,GO:0050789,GO:0051276,GO:0090305,GO:0000932,GO:0005634,GO:0003676,GO:0004527;ID=TraesCS2D02G316000
chr2D	IWGSC_v1.1_201706	gene	405409880	405412216	62	+	.	_Previous_id=TraesCS2D01G316100;Name=TraesCS2D02G316100;_Primconf=HC;_Go=GO:0016021,GO:0016043,GO:0032501,GO:0032502,GO:0042558;ID=TraesCS2D02G316100
chr2D	IWGSC_v1.1_201706	gene	405415844	405421643	53	+	.	_Previous_id=TraesCS2D01G316200;Name=TraesCS2D02G316200;_Primconf=HC;_Go=GO:0006810,GO:0016043,GO:0032501,GO:0042558,GO:0048856,GO:0048869,GO:0050794,GO:0051641,GO:0016021;ID=TraesCS2D02G316200
chr2D	IWGSC_v1.1_201706	gene	405600235	405608281	43	+	.	_Previous_id=TraesCS2D01G316300;Name=TraesCS2D02G316300;_Primconf=HC;_Go=GO:0005488,GO:0016765,GO:0016787,GO:0006139,GO:0006810,GO:0016043,GO:0032501,GO:0042558,GO:0009987,GO:0050789,GO:0012505,GO:0016021,GO:0042995,GO:0043228,GO:0043231,GO:0044422,GO:0044444;ID=TraesCS2D02G316300
chr2D	IWGSC_v1.1_201706	gene	405611804	405628792	47	-	.	_Previous_id=TraesCS2D01G316400;Name=TraesCS2D02G316400;_Primconf=HC;_Go=GO:0000014,GO:0003677,GO:0016887,GO:0030674,GO:0046872,GO:0000019,GO:0000075,GO:0000226,GO:0000724,GO:0000911,GO:0006260,GO:0006312,GO:0006606,GO:0007004,GO:0007131,GO:0007267,GO:0007346,GO:0009560,GO:0009616,GO:0009640,GO:0009793,GO:0009845,GO:0009909,GO:0009933,GO:0010048,GO:0010162,GO:0010182,GO:0010228,GO:0010267,GO:0016…
chr2D	IWGSC_v1.1_201706	gene	405615523	405634042	47	+	.	_Previous_id=TraesCS2D01G316500;Name=TraesCS2D02G316500;_Primconf=HC;_Go=GO:0008152,GO:0009987;ID=TraesCS2D02G316500
chr2D	IWGSC_v1.1_201706	gene	405871348	405871686	27	-	.	_Previous_id=TraesCS2D01G316600;Name=TraesCS2D02G316600;_Primconf=HC;_Go=GO:0003676,GO:0046915,GO:0006810,GO:0032502,GO:0050896,GO:0051641,GO:0065007,GO:0090502,GO:0016021;ID=TraesCS2D02G316600
chr2D	IWGSC_v1.1_201706	gene	406140713	406141509	50	+	.	_Previous_id=TraesCS2D01G316700;Name=TraesCS2D02G316700;_Primconf=HC;_Go=GO:0000786,GO:0005634,GO:0003677,GO:0046982,GO:0006259,GO:0006334,GO:0009058,GO:0010467,GO:0008152,GO:0050789;ID=TraesCS2D02G316700
chr2D	IWGSC_v1.1_201706	gene	406148932	406151209	60	-	.	_Previous_id=TraesCS2D01G316800;Name=TraesCS2D02G316800;_Primconf=HC;_Go=GO:0000795,GO:0007131,GO:0007275,GO:0050794,GO:0055114,GO:0008270,GO:0016491;ID=TraesCS2D02G316800
chr2D	IWGSC_v1.1_201706	gene	406205025	406210195	60	+	.	_Previous_id=TraesCS2D01G316900;Name=TraesCS2D02G316900;_Primconf=HC;_Go=GO:0000166,GO:0003676,GO:0016740,GO:0006259,GO:0051716,GO:0016021;ID=TraesCS2D02G316900
chr2D	IWGSC_v1.1_201706	gene	406260711	406262537	63	+	.	_Previous_id=TraesCS2D01G317000;Name=TraesCS2D02G317000;_Primconf=HC;_Go=GO:0005783,GO:0016021,GO:0032991,GO:0006612,GO:0006984,GO:0009863,GO:0009867,GO:0010363,GO:0030968,GO:0044238,GO:0044249,GO:0008152,GO:0015020,GO:0050403,GO:0050502;ID=TraesCS2D02G317000
chr2D	IWGSC_v1.1_201706	gene	406410175	406411266	43	+	.	_Previous_id=TraesCS2D01G317100;Name=TraesCS2D02G317100;_Primconf=HC;_Go=GO:0003676,GO:0046872,GO:0006002,GO:0006351,GO:0006355,GO:0048731,GO:0061615;ID=TraesCS2D02G317100
chr2D	IWGSC_v1.1_201706	gene	406695655	406695903	46	+	.	_Previous_id=TraesCS2D01G317200;Name=TraesCS2D02G317200;_Primconf=HC;_Go=GO:0006351,GO:0006996,GO:0008284,GO:0009653,GO:0009790,GO:0009892,GO:0010468,GO:0010604,GO:0010646,GO:0030154,GO:0031323,GO:0048513,GO:0051179;ID=TraesCS2D02G317200
chr2D	IWGSC_v1.1_201706	gene	406733288	406733542	46	+	.	_Previous_id=TraesCS2D01G317300;Name=TraesCS2D02G317300;_Primconf=HC;_Go=GO:0007275,GO:0016043,GO:0048522;ID=TraesCS2D02G317300
chr2D	IWGSC_v1.1_201706	gene	406941193	406945833	54	-	.	_Previous_id=TraesCS2D01G317400;Name=TraesCS2D02G317400;_Primconf=HC;_Go=GO:0002237,GO:0006470,GO:0006569,GO:0009627,GO:0009684,GO:0010161,GO:0031348,GO:0043687,GO:0051704,GO:0004722,GO:0005634,GO:0005886,GO:0009506;ID=TraesCS2D02G317400
chr2D	IWGSC_v1.1_201706	gene	406950389	406953470	62	+	.	_Previous_id=TraesCS2D01G317500;Name=TraesCS2D02G317500;_Primconf=HC;_Go=GO:0003913,GO:0009882,GO:0005773,GO:0016604,GO:0006281,GO:0009414,GO:0009583,GO:0009640,GO:0009698,GO:0009785,GO:0010075,GO:0010118,GO:0010343,GO:0010617,GO:0046283,GO:0046777,GO:0048513,GO:0051510,GO:2000026;ID=TraesCS2D02G317500
chr2D	IWGSC_v1.1_201706	gene	407203246	407207509	51	-	.	_Previous_id=TraesCS2D01G317600;Name=TraesCS2D02G317600;_Primconf=HC;_Go=GO:0005634,GO:0005737,GO:0006915,GO:0043170,GO:0044237,GO:0044238,GO:0050896,GO:0065007,GO:0008270;ID=TraesCS2D02G317600
chr2D	IWGSC_v1.1_201706	gene	407215871	407221274	48	+	.	_Previous_id=TraesCS2D01G317700;Name=TraesCS2D02G317700;_Primconf=HC;_Go=GO:0005730,GO:0006996,GO:0010467,GO:0016070,GO:0044249,GO:0050794;ID=TraesCS2D02G317700
chr2D	IWGSC_v1.1_201706	gene	407224064	407225140	61	+	.	_Previous_id=TraesCS2D01G317800;Name=TraesCS2D02G317800;_Primconf=HC;_Go=GO:0004864,GO:0038023,GO:0010427,GO:0005730,GO:0005737,GO:0006952,GO:0009607,GO:0009738;ID=TraesCS2D02G317800
chr2D	IWGSC_v1.1_201706	gene	407225713	407227411	37	-	.	_Previous_id=TraesCS2D01G317900;Name=TraesCS2D02G317900;_Primconf=HC;_Go=GO:0000003,GO:0007275,GO:0009827,GO:0010383,GO:0019222,GO:0043086,GO:0016052,GO:0045490,GO:0048869,GO:0004857,GO:0030599,GO:0045330,GO:0005576,GO:0005618,GO:0016021;ID=TraesCS2D02G317900
chr2D	IWGSC_v1.1_201706	gene	407453693	407453839	40	+	.	_Previous_id=TraesCS2D01G318000;Name=TraesCS2D02G318000;_Primconf=HC;_Go=GO:0006950,GO:0009987,GO:0030001,GO:0065008;ID=TraesCS2D02G318000
chr2D	IWGSC_v1.1_201706	gene	407961091	407969937	51	+	.	_Previous_id=TraesCS2D01G318100;Name=TraesCS2D02G318100;_Primconf=HC;_Go=GO:0000802,GO:0005215,GO:0016787,GO:0007129,GO:0007131,GO:0008152,GO:0050896,GO:0051301,GO:0051327;ID=TraesCS2D02G318100
chr2D	IWGSC_v1.1_201706	gene	407973421	407982957	63	+	.	_Previous_id=TraesCS2D01G318200;Name=TraesCS2D02G318200;_Primconf=HC;_Go=GO:0005634,GO:0005773,GO:0005887,GO:0009624,GO:0009987,GO:0015749,GO:0015770,GO:1902600,GO:0034219,GO:0034220,GO:0051704,GO:0008506,GO:0015145;ID=TraesCS2D02G318200
chr2D	IWGSC_v1.1_201706	gene	408331682	408336358	63	+	.	_Previous_id=TraesCS2D01G318300;Name=TraesCS2D02G318300;_Primconf=HC;_Go=GO:0003824,GO:0008506,GO:0015145,GO:0005634,GO:0005773,GO:0005886,GO:0012505,GO:0016021,GO:0031090,GO:0031982,GO:0042995,GO:0032991,GO:0006863,GO:0009624,GO:0015749,GO:0015770,GO:1902600,GO:0034219,GO:0034220,GO:0044237,GO:0009987,GO:0051704;ID=TraesCS2D02G318300
chr2D	IWGSC_v1.1_201706	gene	408344566	408349774	61	+	.	_Previous_id=TraesCS2D01G318400;Name=TraesCS2D02G318400;_Primconf=HC;_Go=GO:0005634,GO:0005773,GO:0005886,GO:0016021,GO:0006863,GO:0009624,GO:0009987,GO:0015749,GO:0015770,GO:1902600,GO:0034219,GO:0034220,GO:0051704,GO:0008506,GO:0015145;ID=TraesCS2D02G318400
chr2D	IWGSC_v1.1_201706	gene	408361455	408365500	62	-	.	_Previous_id=TraesCS2D01G318500;Name=TraesCS2D02G318500;_Primconf=HC;_Go=GO:0005358,GO:0008506,GO:0005634,GO:0005773,GO:0005886,GO:0016021,GO:0006863,GO:0009624,GO:0009987,GO:1904659,GO:0015770,GO:1902600,GO:0034220,GO:0008645,GO:0051704;ID=TraesCS2D02G318500
chr2D	IWGSC_v1.1_201706	gene	408362401	408362862	30	+	.	_Previous_id=TraesCS2D01G318600;Name=TraesCS2D02G318600;_Primconf=HC;_Go=GO:0005488,GO:0006351,GO:0007275,GO:0010468,GO:0010556,GO:0051252;ID=TraesCS2D02G318600
chr2D	IWGSC_v1.1_201706	gene	408773923	408777388	53	+	.	_Previous_id=TraesCS2D01G318700;Name=TraesCS2D02G318700;_Primconf=HC;_Go=GO:0005488,GO:0009653,GO:0009987,GO:0044238,GO:0048513,GO:0048518,GO:0050794,GO:0050896;ID=TraesCS2D02G318700
chr2D	IWGSC_v1.1_201706	gene	409255280	409260683	59	+	.	_Previous_id=TraesCS2D01G318800;Name=TraesCS2D02G318800;_Primconf=HC;_Go=GO:0005525,GO:0005739,GO:0009507,GO:0042254,GO:0044238,GO:0044260,GO:0065007;ID=TraesCS2D02G318800
chr2D	IWGSC_v1.1_201706	gene	409283379	409284566	31	-	.	_Previous_id=TraesCS2D01G318900;Name=TraesCS2D02G318900;_Primconf=HC;_Go=GO:0004842,GO:0005543,GO:0006950,GO:0009719,GO:0010033,GO:0016567,GO:0031146,GO:0051704,GO:0065007,GO:0070887,GO:0016021,GO:0019005,GO:0030136;ID=TraesCS2D02G318900
chr2D	IWGSC_v1.1_201706	gene	409436752	409438044	44	+	.	_Previous_id=TraesCS2D01G319000;Name=TraesCS2D02G319000;_Primconf=HC;_Go=GO:0003677,GO:0016787,GO:0005634,GO:0005737,GO:0016020,GO:0006281,GO:0006996,GO:0044249,GO:0065007;ID=TraesCS2D02G319000
chr2D	IWGSC_v1.1_201706	gene	409578234	409582840	62	+	.	_Previous_id=TraesCS2D01G319100;Name=TraesCS2D02G319100;_Primconf=HC;_Go=GO:0005634,GO:0005773,GO:0005887,GO:0009624,GO:0009987,GO:0015749,GO:0015770,GO:1902600,GO:0034219,GO:0034220,GO:0051704,GO:0008506,GO:0015145;ID=TraesCS2D02G319100
chr2D	IWGSC_v1.1_201706	gene	409599960	409604615	61	-	.	_Previous_id=TraesCS2D01G319200;Name=TraesCS2D02G319200;_Primconf=HC;_Go=GO:0005634,GO:0005737,GO:0016021,GO:0008168,GO:0016491,GO:0016043,GO:0016192,GO:0032259,GO:0032502,GO:0045184,GO:0046907,GO:0050789,GO:0055114;ID=TraesCS2D02G319200
chr2D	IWGSC_v1.1_201706	gene	410237456	410238274	51	-	.	_Previous_id=TraesCS2D01G319300;Name=TraesCS2D02G319300;_Primconf=HC;_Go=GO:0006810,GO:0016043,GO:0034641,GO:0065007;ID=TraesCS2D02G319300
chr2D	IWGSC_v1.1_201706	gene	410239843	410240208	31	-	.	_Previous_id=TraesCS2D01G319400;Name=TraesCS2D02G319400;_Primconf=HC;_Go=GO:0007275,GO:0016043,GO:0043170,GO:0050789,GO:0051179;ID=TraesCS2D02G319400
chr2D	IWGSC_v1.1_201706	gene	410403725	410404566	50	-	.	_Previous_id=TraesCS2D01G319500;Name=TraesCS2D02G319500;_Primconf=HC;_Go=GO:0005488,GO:0044237;ID=TraesCS2D02G319500
chr2D	IWGSC_v1.1_201706	gene	410407950	410413055	62	-	.	_Previous_id=TraesCS2D01G319600;Name=TraesCS2D02G319600;_Primconf=HC;_Go=GO:0016992,GO:0051539,GO:0005759,GO:0009507,GO:0006546,GO:0006636,GO:0006733,GO:0006766,GO:0009073,GO:0009107,GO:0009249,GO:0009695,GO:0009887,GO:0009965,GO:0015995,GO:0019288,GO:0019344,GO:0019748,GO:0030154,GO:0045893,GO:0048646;ID=TraesCS2D02G319600
chr2D	IWGSC_v1.1_201706	gene	410417997	410424394	49	-	.	_Previous_id=TraesCS2D01G319700;Name=TraesCS2D02G319700;_Primconf=HC;_Go=GO:0003712,GO:0005774,GO:0005789,GO:0005794,GO:0005886,GO:0016021,GO:0033116,GO:0006355,GO:0006626,GO:0006984,GO:0030968,GO:0048193;ID=TraesCS2D02G319700
chr2D	IWGSC_v1.1_201706	gene	410953930	410954821	46	+	.	_Previous_id=TraesCS2D01G319800;Name=TraesCS2D02G319800;_Primconf=HC;_Go=GO:0003008,GO:0006623,GO:0009611,GO:0009695,GO:0005774,GO:0005886,GO:0009535;ID=TraesCS2D02G319800
chr2D	IWGSC_v1.1_201706	gene	411344567	411345922	35	+	.	_Previous_id=TraesCS2D01G319900;Name=TraesCS2D02G319900;_Primconf=HC;_Go=GO:0003723,GO:0004652,GO:0005634,GO:0006351,GO:0016071,GO:0031123,GO:0034660,GO:0043631,GO:0008152;ID=TraesCS2D02G319900
chr2D	IWGSC_v1.1_201706	gene	411412560	411415299	48	+	.	_Previous_id=TraesCS2D01G320100;Name=TraesCS2D02G320100;_Primconf=HC;_Go=GO:0001816,GO:0002682,GO:0006351,GO:0006355,GO:0006796,GO:0006810,GO:0006955,GO:0008284,GO:0009966,GO:0010604,GO:0031325,GO:0032101,GO:0032259,GO:0035556,GO:0042742,GO:0043687,GO:0044093,GO:0048519,GO:0048584,GO:0051239,GO:0003676,GO:0008168,GO:0016021;ID=TraesCS2D02G320100
chr2D	IWGSC_v1.1_201706	gene	411416487	411417559	48	-	.	_Previous_id=TraesCS2D01G320200;Name=TraesCS2D02G320200;_Primconf=HC;_Go=GO:0003746,GO:0003924,GO:0005525,GO:0005737,GO:0006414,GO:0008152;ID=TraesCS2D02G320200
chr2D	IWGSC_v1.1_201706	gene	411417729	411419214	38	-	.	_Previous_id=TraesCS2D01G320300;Name=TraesCS2D02G320300;_Primconf=HC;_Go=GO:0003746,GO:0003924,GO:0005525,GO:0005737,GO:0006414,GO:0009154,GO:0009207,GO:0046039,GO:1901069;ID=TraesCS2D02G320300
chr2D	IWGSC_v1.1_201706	gene	411698369	411701273	55	+	.	_Previous_id=TraesCS2D01G320400;Name=TraesCS2D02G320400;_Primconf=HC;_Go=GO:0006351,GO:0006355,GO:0006810,GO:0006950,GO:0007165,GO:0010646,GO:0032259,GO:0032501,GO:0043687,GO:0048519,GO:0048522,GO:0008168,GO:0016021;ID=TraesCS2D02G320400
chr2D	IWGSC_v1.1_201706	gene	411703315	411705307	46	-	.	_Previous_id=TraesCS2D01G320500;Name=TraesCS2D02G320500;_Primconf=HC;_Go=GO:0003746,GO:0003924,GO:0005525,GO:0005730,GO:0005739,GO:0005773,GO:0005886,GO:0009507,GO:0006414,GO:0009154,GO:0009207,GO:0046039,GO:0046686,GO:1901069;ID=TraesCS2D02G320500
chr2D	IWGSC_v1.1_201706	gene	411731462	411733651	61	-	.	_Previous_id=TraesCS2D01G320600;Name=TraesCS2D02G320600;_Primconf=HC;_Go=GO:0000003,GO:0006468,GO:0009653,GO:0016043,GO:0008152,GO:0004672,GO:0005524,GO:0016021;ID=TraesCS2D02G320600
chr2D	IWGSC_v1.1_201706	gene	411953992	411955590	42	+	.	_Previous_id=TraesCS2D01G320700;Name=TraesCS2D02G320700;_Primconf=HC;_Go=GO:0003723,GO:0004652,GO:0005634,GO:0006351,GO:0006397,GO:0031123,GO:0034660,GO:0043631,GO:0008152;ID=TraesCS2D02G320700
chr2D	IWGSC_v1.1_201706	gene	412254503	412256297	50	+	.	_Previous_id=TraesCS2D01G320800;Name=TraesCS2D02G320800;_Primconf=HC;_Go=GO:0003700,GO:0005488,GO:0005634,GO:0006351,GO:0006355,GO:0006950,GO:0007165,GO:0010033,GO:0070887,GO:0071495;ID=TraesCS2D02G320800
chr2D	IWGSC_v1.1_201706	gene	412280560	412281895	62	-	.	_Previous_id=TraesCS2D01G320900;Name=TraesCS2D02G320900;_Primconf=HC;_Go=GO:0016168,GO:0006816,GO:0007030,GO:0009639,GO:0009651,GO:0009765,GO:0010196,GO:0018298,GO:0019344,GO:0035304,GO:0009522,GO:0009535,GO:0009783,GO:0009941,GO:0010287,GO:0016021;ID=TraesCS2D02G320900
chr2D	IWGSC_v1.1_201706	gene	412332246	412333940	32	+	.	_Previous_id=TraesCS2D01G321000;Name=TraesCS2D02G321000;_Primconf=HC;_Go=GO:0003676,GO:0008408,GO:0006464,GO:0034645,GO:0090305,GO:0016020;ID=TraesCS2D02G321000
chr2D	IWGSC_v1.1_201706	gene	412472405	412475196	62	-	.	_Previous_id=TraesCS2D01G321100;Name=TraesCS2D02G321100;_Primconf=HC;_Go=GO:0004303,GO:0006629,GO:0044237,GO:0044281,GO:0055114,GO:0065007,GO:0016021;ID=TraesCS2D02G321100
chr2D	IWGSC_v1.1_201706	gene	412683548	412688375	57	-	.	_Previous_id=TraesCS2D01G321200;Name=TraesCS2D02G321200;_Primconf=HC;_Go=GO:0016756,GO:0036374,GO:0005773,GO:0016021,GO:0006751,GO:0006805,GO:0006950,GO:0009063;ID=TraesCS2D02G321200
chr2D	IWGSC_v1.1_201706	gene	412832409	412832973	39	+	.	_Previous_id=TraesCS2D01G321300;Name=TraesCS2D02G321300;_Primconf=HC;_Go=GO:0005576,GO:0016021,GO:0009886,GO:0009887,GO:0009913,GO:0010052,GO:0044238,GO:0048646,GO:0048730,GO:2000122,GO:0019901;ID=TraesCS2D02G321300
chr2D	IWGSC_v1.1_201706	gene	412833158	412839366	62	-	.	_Previous_id=TraesCS2D01G321400;Name=TraesCS2D02G321400;_Primconf=HC;_Go=GO:0000226,GO:0000911,GO:0007030,GO:0007062,GO:0007178,GO:0009556,GO:0009742,GO:0009880,GO:0010072,GO:0010152,GO:0010227,GO:0010228,GO:0010431,GO:0042742,GO:0008152,GO:0045595,GO:0046777,GO:0048569,GO:0097306,GO:0004674,GO:0005524,GO:0033612,GO:0005739,GO:0005789,GO:0005886,GO:0016021,GO:0031090,GO:0032991;ID=TraesCS2D02G321…
chr2D	IWGSC_v1.1_201706	gene	413258713	413263358	60	+	.	_Previous_id=TraesCS2D01G321500;Name=TraesCS2D02G321500;_Primconf=HC;_Go=GO:0000166,GO:0016740,GO:0046872,GO:0005634,GO:0016021,GO:0006351,GO:0006355,GO:0007275,GO:0016043,GO:0016310,GO:0030001;ID=TraesCS2D02G321500
chr2D	IWGSC_v1.1_201706	gene	413263896	413266244	62	+	.	_Previous_id=TraesCS2D01G321600;Name=TraesCS2D02G321600;_Primconf=HC;_Go=GO:0004034,GO:0030246,GO:0005829,GO:0016021,GO:0048046,GO:0006066,GO:0019318,GO:0044262,GO:0046365;ID=TraesCS2D02G321600
chr2D	IWGSC_v1.1_201706	gene	413273544	413275357	58	+	.	_Previous_id=TraesCS2D01G321700;Name=TraesCS2D02G321700;_Primconf=HC;_Go=GO:0004034,GO:0030246,GO:0005829,GO:0016021,GO:0048046,GO:0006066,GO:0019318,GO:0044262,GO:0046365;ID=TraesCS2D02G321700
chr2D	IWGSC_v1.1_201706	gene	413287559	413291416	61	+	.	_Previous_id=TraesCS2D01G321800;Name=TraesCS2D02G321800;_Primconf=HC;_Go=GO:0004034,GO:0030246,GO:0005829,GO:0016021,GO:0048046,GO:0006066,GO:0019318,GO:0044262,GO:0046365;ID=TraesCS2D02G321800
chr2D	IWGSC_v1.1_201706	gene	413348291	413354590	63	+	.	_Previous_id=TraesCS2D01G321900;Name=TraesCS2D02G321900;_Primconf=HC;_Go=GO:0004034,GO:0030246,GO:0005829,GO:0016021,GO:0048046,GO:0006006,GO:0006066,GO:0033499,GO:0044262;ID=TraesCS2D02G321900
chr2D	IWGSC_v1.1_201706	gene	413690160	413692122	62	+	.	_Previous_id=TraesCS2D01G322100;Name=TraesCS2D02G322100;_Primconf=HC;_Go=GO:0004034,GO:0030246,GO:0006066,GO:0019318,GO:0044262,GO:0046365,GO:0016021;ID=TraesCS2D02G322100
chr2D	IWGSC_v1.1_201706	gene	413722473	413725823	62	+	.	_Previous_id=TraesCS2D01G322200;Name=TraesCS2D02G322200;_Primconf=HC;_Go=GO:0004034,GO:0030246,GO:0006066,GO:0019318,GO:0044262,GO:0046365,GO:0016021;ID=TraesCS2D02G322200
chr2D	IWGSC_v1.1_201706	gene	413771726	413775060	43	+	.	_Previous_id=TraesCS2D01G322300;Name=TraesCS2D02G322300;_Primconf=HC;_Go=GO:0004034,GO:0030246,GO:0006066,GO:0019318,GO:0044262,GO:0046365,GO:0016021;ID=TraesCS2D02G322300
chr2D	IWGSC_v1.1_201706	gene	413775959	413777298	51	-	.	_Previous_id=TraesCS2D01G322400;Name=TraesCS2D02G322400;_Primconf=HC;_Go=GO:0009653,GO:0009987,GO:0048731,GO:0050789,GO:0051179;ID=TraesCS2D02G322400
chr2D	IWGSC_v1.1_201706	gene	413777752	413779866	52	-	.	_Previous_id=TraesCS2D01G322500;Name=TraesCS2D02G322500;_Primconf=HC;_Go=GO:0000003,GO:0007275,GO:0008152,GO:0009653,GO:0019222,GO:0042545,GO:0043086,GO:0048869,GO:0030599,GO:0045330,GO:0046910,GO:0005618;ID=TraesCS2D02G322500
chr2D	IWGSC_v1.1_201706	gene	413951344	413957843	63	-	.	_Previous_id=TraesCS2D01G322600;Name=TraesCS2D02G322600;_Primconf=HC;_Go=GO:0000271,GO:0008361,GO:0009154,GO:0009207,GO:0009624,GO:0009637,GO:0009640,GO:0009734,GO:0009825,GO:0009913,GO:0009932,GO:0009958,GO:0010048,GO:0010160,GO:0010218,GO:0010315,GO:0010540,GO:0010541,GO:0043481,GO:0046034,GO:0046130,GO:0048440,GO:0048443,GO:0048527,GO:0048569,GO:0048767,GO:0051704,GO:0055085,GO:0071555,GO:0005…
chr2D	IWGSC_v1.1_201706	gene	414401562	414402514	62	+	.	_Previous_id=TraesCS2D01G322700;Name=TraesCS2D02G322700;_Primconf=HC;_Go=GO:0000023,GO:0009767,GO:0010467,GO:0016070,GO:0019222,GO:0019252,GO:0043085,GO:0005509,GO:0045156,GO:0009344,GO:0009535,GO:0009543,GO:0009654,GO:0019898;ID=TraesCS2D02G322700
chr2D	IWGSC_v1.1_201706	gene	414402482	414407591	56	-	.	_Previous_id=TraesCS2D01G322800;Name=TraesCS2D02G322800;_Primconf=HC;_Go=GO:0003777,GO:0005524,GO:0008017,GO:0005737,GO:0005871,GO:0005874,GO:0007010,GO:0007018,GO:0008152,GO:0022403;ID=TraesCS2D02G322800
chr2D	IWGSC_v1.1_201706	gene	414955071	414956541	62	+	.	_Previous_id=TraesCS2D01G322900;Name=TraesCS2D02G322900;_Primconf=HC;_Go=GO:0004365,GO:0047100,GO:0050661,GO:0051287,GO:0006007,GO:0006096,GO:0006098,GO:0006364,GO:0006636,GO:0006740,GO:0009409,GO:0009637,GO:0009644,GO:0009744,GO:0009749,GO:0009773,GO:0009886,GO:0009902,GO:0010103,GO:0010114,GO:0010155,GO:0010207,GO:0010218,GO:0010304,GO:0015995,GO:0019216,GO:0019253,GO:0019288,GO:0019344,GO:0031…
chr2D	IWGSC_v1.1_201706	gene	414955174	414956462	37	-	.	_Previous_id=TraesCS2D01G323000;Name=TraesCS2D02G323000;_Primconf=HC;_Go=GO:0007166,GO:0009653,GO:0010646,GO:0019048,GO:0019058,GO:0031323,GO:0032501,GO:0051801,GO:0016021,GO:0043657;ID=TraesCS2D02G323000
chr2D	IWGSC_v1.1_201706	gene	414957817	414960098	51	-	.	_Previous_id=TraesCS2D01G323100;Name=TraesCS2D02G323100;_Primconf=HC;_Go=GO:0005087,GO:0008536,GO:0017080,GO:0030695,GO:0044325,GO:0005654,GO:0005791,GO:0005829,GO:0014704,GO:0098590,GO:0006873,GO:0006913,GO:0007264,GO:0015031,GO:0019222,GO:0042391,GO:0048522,GO:0050790,GO:2000010,GO:2000649;ID=TraesCS2D02G323100
chr2D	IWGSC_v1.1_201706	gene	414971838	414974458	48	-	.	_Previous_id=TraesCS2D01G323200;Name=TraesCS2D02G323200;_Primconf=HC;_Go=GO:0003676,GO:0005524,GO:0016740,GO:0006355,GO:0007165,GO:0016043,GO:0032259,GO:0048731,GO:0048869,GO:0051179,GO:0016021;ID=TraesCS2D02G323200
chr2D	IWGSC_v1.1_201706	gene	415545782	415546102	37	-	.	_Previous_id=TraesCS2D01G323300;Name=TraesCS2D02G323300;_Primconf=HC;_Go=GO:0003746,GO:0003924,GO:0005525,GO:0005737,GO:0016021,GO:0006414,GO:0009154,GO:0009207,GO:0046039,GO:1901069;ID=TraesCS2D02G323300
chr2D	IWGSC_v1.1_201706	gene	416390718	416398041	59	-	.	_Previous_id=TraesCS2D01G323400;Name=TraesCS2D02G323400;_Primconf=HC;_Go=GO:0005087,GO:0008536,GO:0017080,GO:0030695,GO:0044325,GO:0005654,GO:0005791,GO:0005829,GO:0014704,GO:0098590,GO:0006873,GO:0006913,GO:0007264,GO:0015031,GO:0019222,GO:0042391,GO:0048522,GO:0050790,GO:2000010,GO:2000649;ID=TraesCS2D02G323400
chr2D	IWGSC_v1.1_201706	gene	416401053	416406189	60	-	.	_Previous_id=TraesCS2D01G323500;Name=TraesCS2D02G323500;_Primconf=HC;_Go=GO:0005634,GO:0005737,GO:0006259,GO:0006334,GO:0008283,GO:0009886,GO:0010311,GO:0010467,GO:0030154,GO:0034645,GO:0008152,GO:0046686,GO:0048569,GO:0048645,GO:0050794;ID=TraesCS2D02G323500
chr2D	IWGSC_v1.1_201706	gene	416757395	416762278	51	-	.	_Previous_id=TraesCS2D01G323600;Name=TraesCS2D02G323600;_Primconf=HC;_Go=GO:0000958,GO:0000962,GO:0000965,GO:0006310,GO:0009154,GO:0009207,GO:0009220,GO:0009555,GO:0009561,GO:0030307,GO:0032508,GO:0035945,GO:0035946,GO:0043066,GO:0046034,GO:0046130,GO:0070584,GO:0070827,GO:0003725,GO:0004004,GO:0005524,GO:0034458,GO:0005634,GO:0016021,GO:0042645,GO:0032991,GO:0045025;ID=TraesCS2D02G323600
chr2D	IWGSC_v1.1_201706	gene	416854893	416860644	63	+	.	_Previous_id=TraesCS2D01G323700;Name=TraesCS2D02G323700;_Primconf=HC;_Go=GO:0000023,GO:0006007,GO:0006098,GO:0006508,GO:0006740,GO:0010027,GO:0010206,GO:0010304,GO:0015996,GO:0016138,GO:0019252,GO:0019761,GO:0004252,GO:0032440,GO:0005634,GO:0009535,GO:0009543;ID=TraesCS2D02G323700
chr2D	IWGSC_v1.1_201706	gene	416861673	416861984	46	+	.	_Previous_id=TraesCS2D01G323800;Name=TraesCS2D02G323800;_Primconf=HC;_Go=GO:0006139,GO:0016043,GO:0044260,GO:0050794;ID=TraesCS2D02G323800
chr2D	IWGSC_v1.1_201706	gene	416932142	416934389	61	+	.	_Previous_id=TraesCS2D01G323900;Name=TraesCS2D02G323900;_Primconf=HC;_Go=GO:0001510,GO:0006412,GO:0007275,GO:0040007,GO:0008152,GO:0050789,GO:0003735,GO:0005730,GO:0005774,GO:0005886,GO:0009507,GO:0022625;ID=TraesCS2D02G323900
chr2D	IWGSC_v1.1_201706	gene	417086434	417087925	.	+	.	_Derived_from=TraesCS2D01G324000,maker-chr2D-exonerate_est2genome-gene-1390.1;Name=TraesCS2D02G324000;_Go=GO:0003333,GO:0009987,GO:0015824,GO:0015837,GO:0005275,GO:0015171,GO:0022804,GO:0005774,GO:0016021;_Curating_team=IWGSC_kingr;_Manually_curated=yes;ID=TraesCS2D02G324000
chr2D	IWGSC_v1.1_201706	gene	417090322	417092425	61	-	.	_Derived_from=TraesCS2D01G324100,PPRFinder_493;Name=TraesCS2D02G324100;_Primconf=HC;_Go=GO:0000966,GO:0006397,GO:0009451,GO:0090305,GO:0003723,GO:0004519,GO:0005739,GO:0009507,GO:0016020;_Curating_team=IWGSC_steinn;_Manually_curated=yes;ID=TraesCS2D02G324100
chr2D	IWGSC_v1.1_201706	gene	417159753	417165423	62	+	.	_Previous_id=TraesCS2D01G324200;Name=TraesCS2D02G324200;_Primconf=HC;_Go=GO:0000003,GO:0007165,GO:0009154,GO:0009207,GO:0010035,GO:0015700,GO:0046034,GO:0046130,GO:0051704,GO:0071722,GO:0098655,GO:0098656,GO:0005524,GO:0015446,GO:0005783,GO:0009570;ID=TraesCS2D02G324200
chr2D	IWGSC_v1.1_201706	gene	417183533	417185091	.	+	.	_Derived_from=TraesCS2D01G324300,maker-chr2D-exonerate_est2genome-gene-1390.2;Name=TraesCS2D02G324300;_Old_locus_tag=Traes_2DL_D7838D343_Traes_2DL_216EA69E1,Traes_2DL_D7838D343_Traes_2DL_216EA69E1;_Go=GO:0003333,GO:0009987,GO:0015824,GO:0015837,GO:0005275,GO:0015171,GO:0022804,GO:0005774,GO:0016021;_Curating_team=IWGSC_kingr;_Manually_curated=yes;ID=TraesCS2D02G324300
chr2D	IWGSC_v1.1_201706	gene	417210371	417212046	.	+	.	_Derived_from=TraesCS2D01G324400,maker-chr2D-exonerate_est2genome-gene-1390.5;Name=TraesCS2D02G324400;_Old_locus_tag=Traes_2DL_216EA69E1,Traes_2DL_D7838D343;_Go=GO:0003333,GO:0009987,GO:0015837,GO:0005275,GO:0015171,GO:0022804,GO:0005774,GO:0016021;_Curating_team=IWGSC_kingr;_Manually_curated=yes;ID=TraesCS2D02G324400
chr2D	IWGSC_v1.1_201706	gene	417212833	417212994	41	-	.	_Previous_id=TraesCS2D01G324500;Name=TraesCS2D02G324500;_Primconf=HC;_Go=GO:0016021,GO:0044237;ID=TraesCS2D02G324500
chr2D	IWGSC_v1.1_201706	gene	417378573	417384328	46	+	.	_Previous_id=TraesCS2D01G324600;Name=TraesCS2D02G324600;_Primconf=HC;_Go=GO:0003824,GO:0005739,GO:0009507,GO:0019008,GO:0006777,GO:0032324;ID=TraesCS2D02G324600
chr2D	IWGSC_v1.1_201706	gene	417543627	417545330	60	+	.	_Previous_id=TraesCS2D01G324700;Name=TraesCS2D02G324700;_Primconf=HC;_Go=GO:0000303,GO:0006351,GO:0006355,GO:0009414,GO:0009733,GO:0009738,GO:0009743,GO:0009753,GO:0009873,GO:0010150,GO:0010260,GO:0042538,GO:0003677,GO:0005634;ID=TraesCS2D02G324700
chr2D	IWGSC_v1.1_201706	gene	417624770	417627542	62	+	.	_Previous_id=TraesCS2D01G324800;Name=TraesCS2D02G324800;_Primconf=HC;_Go=GO:0006357,GO:0009651,GO:0009723,GO:0009733,GO:0009739,GO:0009751,GO:0009753,GO:0009913,GO:0010091,GO:0010092,GO:0010093,GO:0034645,GO:0046686,GO:0048440,GO:0048507,GO:0048563,GO:0090304,GO:0000981,GO:0001135,GO:0003682,GO:0043565,GO:0044212,GO:0005634,GO:0016021;ID=TraesCS2D02G324800
chr2D	IWGSC_v1.1_201706	gene	417631414	417633180	60	+	.	_Previous_id=TraesCS2D01G324900;Name=TraesCS2D02G324900;_Primconf=HC;_Go=GO:0003735,GO:0005488,GO:0005840,GO:0009535,GO:0009570,GO:0006950,GO:0009886,GO:0010103,GO:0019288,GO:0032544,GO:0048513,GO:0048646,GO:0050789;ID=TraesCS2D02G324900
chr2D	IWGSC_v1.1_201706	gene	418044489	418059958	59	+	.	_Previous_id=TraesCS2D01G325000;Name=TraesCS2D02G325000;_Primconf=HC;_Go=GO:0000165,GO:0006351,GO:0007584,GO:0009556,GO:0010440,GO:0045944,GO:0048481,GO:0048527,GO:0048569,GO:0048578,GO:0052543,GO:0055114,GO:0061025,GO:0000977,GO:0003700,GO:0008134,GO:0032440,GO:0046983,GO:0005634;ID=TraesCS2D02G325000
chr2D	IWGSC_v1.1_201706	gene	418763556	418764067	35	-	.	_Previous_id=TraesCS2D01G325100;Name=TraesCS2D02G325100;_Primconf=HC;_Go=GO:0006950,GO:0008152,GO:0042221,GO:0048235,GO:0016021;ID=TraesCS2D02G325100
chr2D	IWGSC_v1.1_201706	gene	418774197	418777460	62	-	.	_Previous_id=TraesCS2D01G325200;Name=TraesCS2D02G325200;_Primconf=HC;_Go=GO:0051015,GO:0005576,GO:0016021,GO:0030041,GO:0045010,GO:0048451,GO:0048453,GO:0051016;ID=TraesCS2D02G325200
chr2D	IWGSC_v1.1_201706	gene	419024828	419025750	52	+	.	_Previous_id=TraesCS2D01G325300;Name=TraesCS2D02G325300;_Primconf=HC;_Go=GO:0006508,GO:0006869,GO:0016043,GO:0050789,GO:0008289,GO:0016021;ID=TraesCS2D02G325300
chr2D	IWGSC_v1.1_201706	gene	419025841	419027512	62	-	.	_Previous_id=TraesCS2D01G325400;Name=TraesCS2D02G325400;_Primconf=HC;_Go=GO:0004672,GO:0005524,GO:0006468,GO:0010467,GO:0090304,GO:0016021;ID=TraesCS2D02G325400
chr2D	IWGSC_v1.1_201706	gene	419030554	419032600	.	-	.	_Derived_from=TraesCS2D01G325500,maker-chr2D-exonerate_est2genome-gene-1396.0;Name=TraesCS2D02G325500;_Old_locus_tag=Traes_2DL_C511AE8BA,Traes_2DL_4F1BF0D17,Traes_2DL_0F29AFB4F,Traes_2DL_D9ED58A32,Traes_2DL_5D1822CA1;_Go=GO:0003333,GO:0006412,GO:0006499,GO:0006612,GO:0006862,GO:0006888,GO:0006984,GO:0010363,GO:0015672,GO:0015696,GO:0015698,GO:0015800,GO:0015802,GO:0015804,GO:0015837,GO:0030968,GO…
chr2D	IWGSC_v1.1_201706	gene	419039525	419043028	60	+	.	_Previous_id=TraesCS2D01G325600;Name=TraesCS2D02G325600;_Primconf=HC;_Go=GO:0000077,GO:0006486,GO:0006588,GO:0006888,GO:0009407,GO:0009742,GO:0043090,GO:0046219,GO:0046686,GO:0071156,GO:0071901,GO:0097306,GO:0004623,GO:0019904,GO:0045309,GO:0005618,GO:0005634,GO:0005739,GO:0005774,GO:0005794,GO:0005829,GO:0005886,GO:0009506,GO:0009570,GO:0048046;ID=TraesCS2D02G325600
chr2D	IWGSC_v1.1_201706	gene	419045016	419047986	56	-	.	_Previous_id=TraesCS2D01G325700;Name=TraesCS2D02G325700;_Primconf=HC;_Go=GO:0008092,GO:0008574,GO:0045505,GO:0051959,GO:0005737,GO:0005868,GO:0042995,GO:0007275,GO:0010970,GO:0060271,GO:2000582;ID=TraesCS2D02G325700
chr2D	IWGSC_v1.1_201706	gene	419050912	419052022	53	-	.	_Previous_id=TraesCS2D01G325800;Name=TraesCS2D02G325800;_Primconf=HC;_Go=GO:0005730,GO:0005743,GO:0005773,GO:0005886,GO:0009505,GO:0009507,GO:0045271,GO:1990429,GO:0006139,GO:0007005,GO:0009651,GO:0009733,GO:0016049,GO:0019222,GO:0019538,GO:0044249,GO:0044260,GO:0048523,GO:0048527,GO:0048569,GO:0051301,GO:0071731,GO:0006996;ID=TraesCS2D02G325800
chr2D	IWGSC_v1.1_201706	gene	419364102	419366631	63	-	.	_Previous_id=TraesCS2D01G325900;Name=TraesCS2D02G325900;_Primconf=HC;_Go=GO:0000272,GO:0002679,GO:0005982,GO:0006084,GO:0006468,GO:0006888,GO:0007020,GO:0007389,GO:0008361,GO:0009610,GO:0009737,GO:0009743,GO:0009832,GO:0009913,GO:0009926,GO:0010075,GO:0010200,GO:0016126,GO:0016132,GO:0023052,GO:0042545,GO:0043090,GO:0016052,GO:0046165,GO:0048513,GO:0048646,GO:0048767,GO:0050794,GO:0051704,GO:0052…
chr2D	IWGSC_v1.1_201706	gene	419479923	419480709	35	+	.	_Previous_id=TraesCS2D01G326000;Name=TraesCS2D02G326000;_Primconf=HC;_Go=GO:0016021,GO:0032501,GO:0044237,GO:0050789;ID=TraesCS2D02G326000
chr2D	IWGSC_v1.1_201706	gene	419673778	419674653	53	+	.	_Previous_id=TraesCS2D01G326100;Name=TraesCS2D02G326100;_Primconf=HC;_Go=GO:0016021,GO:0032501,GO:0032502,GO:0044237,GO:0065007;ID=TraesCS2D02G326100
chr2D	IWGSC_v1.1_201706	gene	419778959	419781974	61	+	.	_Derived_from=TraesCS2D01G326200,PPRFinder_494;Name=TraesCS2D02G326200;_Primconf=HC;_Go=GO:0000966,GO:0009451,GO:0009793,GO:0090305,GO:0003723,GO:0004519,GO:0005739,GO:0009507;_Curating_team=IWGSC_steinn;_Manually_curated=yes;ID=TraesCS2D02G326200
chr2D	IWGSC_v1.1_201706	gene	419781553	419783725	59	-	.	_Previous_id=TraesCS2D01G326300;Name=TraesCS2D02G326300;_Primconf=HC;_Go=GO:0005381,GO:0005384,GO:0005774,GO:0016021,GO:0006880,GO:0032502,GO:0034755;ID=TraesCS2D02G326300
chr2D	IWGSC_v1.1_201706	gene	419784062	419787067	60	-	.	_Previous_id=TraesCS2D01G326400;Name=TraesCS2D02G326400;_Primconf=HC;_Go=GO:0000162,GO:0006575,GO:0009617,GO:0009651,GO:0009723,GO:0009851,GO:0009886,GO:0010311,GO:0042180,GO:0042398,GO:0048569,GO:0048645,GO:0051704,GO:0004049,GO:0005829,GO:0005950,GO:0009507;ID=TraesCS2D02G326400
chr2D	IWGSC_v1.1_201706	gene	419798720	419800255	48	+	.	_Previous_id=TraesCS2D01G326500;Name=TraesCS2D02G326500;_Primconf=HC;_Go=GO:0003677,GO:0016301,GO:0016773,GO:0005634,GO:0005840,GO:0016021,GO:0006014,GO:0006412,GO:0006950,GO:0010468,GO:0010556,GO:0010604,GO:0016070,GO:0019219,GO:0031325,GO:0031326,GO:0032501,GO:0046835;ID=TraesCS2D02G326500
chr2D	IWGSC_v1.1_201706	gene	419803543	419804967	60	-	.	_Previous_id=TraesCS2D01G326600;Name=TraesCS2D02G326600;_Primconf=HC;_Go=GO:0003676,GO:0008270,GO:0016740,GO:0005694,GO:0012505,GO:0016020,GO:0042995,GO:0032991,GO:0044428,GO:0044444,GO:0009056,GO:0016070,GO:0044267,GO:0009987,GO:0032502,GO:0050794,GO:0050896;ID=TraesCS2D02G326600
chr2D	IWGSC_v1.1_201706	gene	420164934	420167407	54	-	.	_Previous_id=TraesCS2D01G326700;Name=TraesCS2D02G326700;_Primconf=HC;_Go=GO:0000151,GO:0043161,GO:0050789;ID=TraesCS2D02G326700
chr2D	IWGSC_v1.1_201706	gene	420169886	420172213	41	-	.	_Derived_from=TraesCS2D01G326800,PPRFinder_495;Name=TraesCS2D02G326800;_Primconf=HC;_Go=GO:0003723,GO:0004519,GO:0008270,GO:0005739,GO:0009507,GO:0016020,GO:0010087,GO:0010305,GO:0010588,GO:0016556,GO:0031425,GO:0048513,GO:0090305;_Curating_team=IWGSC_steinn;_Manually_curated=yes;ID=TraesCS2D02G326800
chr2D	IWGSC_v1.1_201706	gene	420174305	420180243	62	-	.	_Previous_id=TraesCS2D01G326900;Name=TraesCS2D02G326900;_Primconf=HC;_Go=GO:0004028,GO:0008802,GO:0019145,GO:0033737,GO:0005618,GO:0005739,GO:0005777,GO:0005829,GO:0009507,GO:0009516,GO:0009414,GO:0009651,GO:0009737,GO:0019285,GO:0032501,GO:0042439,GO:0044238,GO:0046685,GO:0055114;ID=TraesCS2D02G326900
chr2D	IWGSC_v1.1_201706	gene	420309371	420312903	58	-	.	_Previous_id=TraesCS2D01G327000;Name=TraesCS2D02G327000;_Primconf=HC;_Go=GO:0003824,GO:0005488,GO:0015112,GO:0005773,GO:0005886,GO:0012505,GO:0016021,GO:0044422,GO:0006857,GO:0009414,GO:0009635,GO:0009734,GO:0010167,GO:0015706,GO:0016126,GO:0016138,GO:0019761,GO:0034220,GO:0042128,GO:0005975,GO:0006810,GO:0046165,GO:0052541,GO:0052546;ID=TraesCS2D02G327000
chr2D	IWGSC_v1.1_201706	gene	420521767	420526011	62	+	.	_Previous_id=TraesCS2D01G327100;Name=TraesCS2D02G327100;_Primconf=HC;_Go=GO:0000045,GO:0000087,GO:0005977,GO:0007030,GO:0007080,GO:0051321,GO:0009267,GO:0010324,GO:0010951,GO:0030433,GO:0030437,GO:0031134,GO:0031396,GO:0031468,GO:0032507,GO:0034453,GO:0034727,GO:0042176,GO:0051028,GO:0051327,GO:0061025,GO:0005634,GO:0005694,GO:0005783,GO:0005795,GO:0005801,GO:0005829,GO:0019888,GO:0033130,GO:0043…
chr2D	IWGSC_v1.1_201706	gene	420558417	420561161	60	+	.	_Previous_id=TraesCS2D01G327200;Name=TraesCS2D02G327200;_Primconf=HC;_Go=GO:0003677,GO:0008270,GO:0005739,GO:0006351,GO:0006355,GO:0007275;ID=TraesCS2D02G327200
chr2D	IWGSC_v1.1_201706	gene	420583357	420592280	60	-	.	_Previous_id=TraesCS2D01G327400;Name=TraesCS2D02G327400;_Primconf=HC;_Go=GO:0000372,GO:0000373,GO:0003723,GO:0005739,GO:0009507,GO:0009532,GO:0016020,GO:1990904;ID=TraesCS2D02G327400
chr2D	IWGSC_v1.1_201706	gene	420739149	420741885	52	+	.	_Previous_id=TraesCS2D01G327500;Name=TraesCS2D02G327500;_Primconf=HC;_Go=GO:0003676,GO:0004672,GO:0005524,GO:0030246,GO:0005885,GO:0016021,GO:0007275,GO:0015074,GO:0034314;ID=TraesCS2D02G327500
chr2D	IWGSC_v1.1_201706	gene	420893946	420899160	49	+	.	_Previous_id=TraesCS2D01G327600;Name=TraesCS2D02G327600;_Primconf=HC;_Go=GO:0005524,GO:0005634,GO:0016021,GO:0007062,GO:0007131,GO:0031048,GO:0032501,GO:0032502,GO:0033044,GO:0042138,GO:0045132;ID=TraesCS2D02G327600
chr2D	IWGSC_v1.1_201706	gene	420900155	420901165	60	-	.	_Previous_id=TraesCS2D01G327700;Name=TraesCS2D02G327700;_Primconf=HC;_Go=GO:0004601,GO:0020037,GO:0046872,GO:0005576,GO:0009505,GO:0006979,GO:0009628,GO:0042744,GO:0055114,GO:0098869;ID=TraesCS2D02G327700
chr2D	IWGSC_v1.1_201706	gene	420990553	420991075	42	-	.	_Previous_id=TraesCS2D01G327800;Name=TraesCS2D02G327800;_Primconf=HC;_Go=GO:0004709,GO:0008047,GO:0005576,GO:0005886,GO:0009505,GO:0016021,GO:0009737,GO:0009739,GO:0009987;ID=TraesCS2D02G327800
chr2D	IWGSC_v1.1_201706	gene	421138440	421141246	53	+	.	_Previous_id=TraesCS2D01G327900;Name=TraesCS2D02G327900;_Primconf=HC;_Go=GO:0000904,GO:0006955,GO:0007267,GO:0007399,GO:0009966,GO:0010411,GO:0012501,GO:0018209,GO:0019221,GO:0019226,GO:0022610,GO:0031323,GO:0031644,GO:0035556,GO:0042127,GO:0043067,GO:0005975,GO:0048522,GO:0050793,GO:0051234,GO:0051704,GO:0065008,GO:0080090,GO:0005794,GO:0016021,GO:0016413;ID=TraesCS2D02G327900
chr2D	IWGSC_v1.1_201706	gene	421141195	421144690	57	-	.	_Previous_id=TraesCS2D01G328000;Name=TraesCS2D02G328000;_Primconf=HC;_Go=GO:0006475,GO:0016043,GO:0017198,GO:0018002,GO:0032501,GO:0050789,GO:1990189,GO:1990190,GO:0009507,GO:0022626,GO:0031415;ID=TraesCS2D02G328000
chr2D	IWGSC_v1.1_201706	gene	421468017	421477399	63	+	.	_Previous_id=TraesCS2D01G328100;Name=TraesCS2D02G328100;_Primconf=HC;_Go=GO:0000398,GO:0001172,GO:0003002,GO:0006306,GO:0006346,GO:0007267,GO:0009616,GO:0009790,GO:0009791,GO:0009855,GO:0010014,GO:0010073,GO:0010267,GO:0010495,GO:0034660,GO:0035196,GO:0043687,GO:0045893,GO:0048468,GO:0048513,GO:0048646,GO:0048863,GO:0050832,GO:0051276,GO:0003723,GO:0003968,GO:0005730,GO:0016021;ID=TraesCS2D02G328…
chr2D	IWGSC_v1.1_201706	gene	421480422	421481366	52	+	.	_Previous_id=TraesCS2D01G328200;Name=TraesCS2D02G328200;_Primconf=HC;_Go=GO:0005488,GO:0006952,GO:0009607,GO:0009738,GO:0016556,GO:0016020;ID=TraesCS2D02G328200
chr2D	IWGSC_v1.1_201706	gene	421774284	421792667	50	+	.	_Previous_id=TraesCS2D01G328300;Name=TraesCS2D02G328300;_Primconf=HC;_Go=GO:0000398,GO:0001172,GO:0003002,GO:0006306,GO:0006346,GO:0007267,GO:0009616,GO:0009790,GO:0009791,GO:0009855,GO:0010014,GO:0010073,GO:0010267,GO:0010495,GO:0034660,GO:0035196,GO:0043687,GO:0045893,GO:0048468,GO:0048513,GO:0048646,GO:0048863,GO:0050832,GO:0051276,GO:0003723,GO:0003968,GO:0005730,GO:0016021;ID=TraesCS2D02G328…
chr2D	IWGSC_v1.1_201706	gene	421793353	421795259	58	+	.	_Previous_id=TraesCS2D01G328400;Name=TraesCS2D02G328400;_Primconf=HC;_Go=GO:0006810,GO:0006952,GO:0006955,GO:0016310,GO:0016021,GO:0016301;ID=TraesCS2D02G328400
chr2D	IWGSC_v1.1_201706	gene	421795612	421797761	51	-	.	_Previous_id=TraesCS2D01G328500;Name=TraesCS2D02G328500;_Primconf=HC;_Go=GO:0004674,GO:0005524,GO:0006468,GO:0007165,GO:0032501,GO:0008152,GO:0048856;ID=TraesCS2D02G328500
chr2D	IWGSC_v1.1_201706	gene	421814733	421815432	46	+	.	_Previous_id=TraesCS2D01G328600;Name=TraesCS2D02G328600;_Primconf=HC;_Go=GO:0000166,GO:0016791,GO:0005975,GO:0006139,GO:0006470,GO:0007275,GO:0009058,GO:0010467,GO:0016021;ID=TraesCS2D02G328600
chr2D	IWGSC_v1.1_201706	gene	421819514	421826490	59	-	.	_Previous_id=TraesCS2D01G328700;Name=TraesCS2D02G328700;_Primconf=HC;_Go=GO:0004222,GO:0005524,GO:0008270,GO:0008568,GO:0005739,GO:0005886,GO:0009941,GO:0016021,GO:0042651,GO:0006508,GO:0009154,GO:0009207,GO:0009401,GO:0030163,GO:0034219,GO:0044260,GO:0046034,GO:0046130,GO:0051301;ID=TraesCS2D02G328700
chr2D	IWGSC_v1.1_201706	gene	422079023	422085254	62	+	.	_Previous_id=TraesCS2D01G328900;Name=TraesCS2D02G328900;_Primconf=HC;_Go=GO:0004668,GO:0047632,GO:0006355,GO:0006366,GO:0010629,GO:0031327,GO:0033388,GO:0051172;ID=TraesCS2D02G328900
chr2D	IWGSC_v1.1_201706	gene	422083741	422093108	62	-	.	_Previous_id=TraesCS2D01G329000;Name=TraesCS2D02G329000;_Primconf=HC;_Go=GO:0000470,GO:0006270,GO:0032501,GO:0048518,GO:0090329,GO:0003682,GO:0009506,GO:0016020,GO:0030687,GO:0071339,GO:0097344;ID=TraesCS2D02G329000
chr2D	IWGSC_v1.1_201706	gene	422202925	422203615	42	+	.	_Previous_id=TraesCS2D01G329100;Name=TraesCS2D02G329100;_Primconf=HC;_Go=GO:0006950,GO:0019538,GO:0042221,GO:0044260,GO:0050789,GO:0051179,GO:0051716,GO:0016209;ID=TraesCS2D02G329100
chr2D	IWGSC_v1.1_201706	gene	422324259	422324968	42	+	.	_Previous_id=TraesCS2D01G329200;Name=TraesCS2D02G329200;_Primconf=HC;_Go=GO:0032502,GO:0044249,GO:0044260,GO:0050794,GO:0050896,GO:0090304;ID=TraesCS2D02G329200
chr2D	IWGSC_v1.1_201706	gene	422325283	422330374	49	-	.	_Previous_id=TraesCS2D01G329300;Name=TraesCS2D02G329300;_Primconf=HC;_Go=GO:0005488,GO:0016740,GO:0016853,GO:0016874,GO:0005886,GO:0016043,GO:0016192,GO:0051641;ID=TraesCS2D02G329300
chr2D	IWGSC_v1.1_201706	gene	422757604	422761842	63	-	.	_Previous_id=TraesCS2D01G329400;Name=TraesCS2D02G329400;_Primconf=HC;_Go=GO:0000289,GO:0006397,GO:0006629,GO:0006952,GO:0009560,GO:0009737,GO:0009751,GO:0010646,GO:0023052,GO:0051171,GO:0070887,GO:0090503,GO:0003723,GO:0004535,GO:0005634,GO:0005739;ID=TraesCS2D02G329400
chr2D	IWGSC_v1.1_201706	gene	422764285	422773547	62	-	.	_Previous_id=TraesCS2D01G329500;Name=TraesCS2D02G329500;_Primconf=HC;_Go=GO:0000162,GO:0006569,GO:0006575,GO:0009627,GO:0009684,GO:0034976,GO:0042180,GO:0042398,GO:0042742,GO:0043648,GO:0051704,GO:0004425,GO:0005507,GO:0005829,GO:0009570;ID=TraesCS2D02G329500
chr2D	IWGSC_v1.1_201706	gene	422779115	422784211	60	-	.	_Previous_id=TraesCS2D01G329600;Name=TraesCS2D02G329600;_Primconf=HC;_Go=GO:0006260,GO:0006310,GO:0006357,GO:0006950,GO:0009653,GO:0009888,GO:0010467,GO:0010646,GO:0016233,GO:0030154,GO:0032212,GO:0032774,GO:0008152,GO:0045740,GO:0045892,GO:0048513,GO:0048609,GO:0051726,GO:0000783,GO:0043047;ID=TraesCS2D02G329600
chr2D	IWGSC_v1.1_201706	gene	422793242	422800262	54	-	.	_Previous_id=TraesCS2D01G329700;Name=TraesCS2D02G329700;_Primconf=HC;_Go=GO:0000784,GO:0005739,GO:0005871,GO:0005874,GO:0015629,GO:0016020,GO:0003777,GO:0005524,GO:0008017,GO:0007010,GO:0007018,GO:0008152;ID=TraesCS2D02G329700
chr2D	IWGSC_v1.1_201706	gene	422825917	422827012	59	-	.	_Previous_id=TraesCS2D01G329800;Name=TraesCS2D02G329800;_Primconf=HC;_Go=GO:0005737,GO:0007275,GO:0008152,GO:0030001,GO:0046916,GO:0046914;ID=TraesCS2D02G329800
chr2D	IWGSC_v1.1_201706	gene	422881742	422883055	59	-	.	_Previous_id=TraesCS2D01G329900;Name=TraesCS2D02G329900;_Primconf=HC;_Go=GO:0046914,GO:0005737,GO:0030001,GO:0044237,GO:0044238,GO:0046916;ID=TraesCS2D02G329900
chr2D	IWGSC_v1.1_201706	gene	423172687	423173211	39	-	.	_Previous_id=TraesCS2D01G330000;Name=TraesCS2D02G330000;_Primconf=HC;_Go=GO:0046914,GO:0005737,GO:0007165,GO:0030001,GO:0034641,GO:0042221,GO:0044249,GO:0046916,GO:0048518,GO:0048731;ID=TraesCS2D02G330000
chr2D	IWGSC_v1.1_201706	gene	423208979	423209492	39	-	.	_Previous_id=TraesCS2D01G330100;Name=TraesCS2D02G330100;_Primconf=HC;_Go=GO:0046914,GO:0005737,GO:0007165,GO:0030001,GO:0034641,GO:0042221,GO:0043170,GO:0044249,GO:0046916,GO:0048522,GO:0048731;ID=TraesCS2D02G330100
chr2D	IWGSC_v1.1_201706	gene	423212466	423213341	49	-	.	_Previous_id=TraesCS2D01G330200;Name=TraesCS2D02G330200;_Primconf=HC;_Go=GO:0046914,GO:0005737,GO:0006338,GO:0009059,GO:0010467,GO:0030001,GO:0032502,GO:0044249,GO:0044260,GO:0046916,GO:0051276,GO:0080090,GO:0090304;ID=TraesCS2D02G330200
chr2D	IWGSC_v1.1_201706	gene	423279797	423280466	36	-	.	_Previous_id=TraesCS2D01G330300;Name=TraesCS2D02G330300;_Primconf=HC;_Go=GO:0016787,GO:0046914,GO:0005737,GO:0030001,GO:0044249,GO:0046916,GO:0048731,GO:0050789,GO:0070647;ID=TraesCS2D02G330300
chr2D	IWGSC_v1.1_201706	gene	423287789	423288289	37	-	.	_Previous_id=TraesCS2D01G330400;Name=TraesCS2D02G330400;_Primconf=HC;_Go=GO:0046914,GO:0005737,GO:0030001,GO:0044238,GO:0044260,GO:0046916,GO:0048731,GO:0050789;ID=TraesCS2D02G330400
chr2D	IWGSC_v1.1_201706	gene	423291993	423292515	41	-	.	_Previous_id=TraesCS2D01G330500;Name=TraesCS2D02G330500;_Primconf=HC;_Go=GO:0005737,GO:0016043,GO:0030001,GO:0046916,GO:0046914;ID=TraesCS2D02G330500
chr2D	IWGSC_v1.1_201706	gene	423304053	423304739	54	-	.	_Previous_id=TraesCS2D01G330600;Name=TraesCS2D02G330600;_Primconf=HC;_Go=GO:0005737,GO:0006351,GO:0010556,GO:0019219,GO:0030001,GO:0031327,GO:0043687,GO:0046916,GO:0050896,GO:0070647,GO:0046914;ID=TraesCS2D02G330600
chr2D	IWGSC_v1.1_201706	gene	423347251	423347906	49	-	.	_Previous_id=TraesCS2D01G330700;Name=TraesCS2D02G330700;_Primconf=HC;_Go=GO:0005737,GO:0006351,GO:0010556,GO:0019219,GO:0030001,GO:0032501,GO:0046916,GO:0016627,GO:0046914;ID=TraesCS2D02G330700
chr2D	IWGSC_v1.1_201706	gene	423360310	423360723	31	-	.	_Previous_id=TraesCS2D01G330800;Name=TraesCS2D02G330800;_Primconf=HC;_Go=GO:0004601,GO:0020037,GO:0022857,GO:0006139,GO:0006979,GO:0016043,GO:0042744,GO:0044260,GO:0048522,GO:0055085,GO:0055114,GO:0098869,GO:0016021;ID=TraesCS2D02G330800
chr2D	IWGSC_v1.1_201706	gene	423371563	423374990	41	-	.	_Previous_id=TraesCS2D01G330900;Name=TraesCS2D02G330900;_Primconf=HC;_Go=GO:0008324,GO:0016887,GO:0046914,GO:0005886,GO:0009507,GO:0012505,GO:0016021,GO:0031975,GO:0007275,GO:0030001,GO:0044238,GO:0044260,GO:0046916,GO:0050794;ID=TraesCS2D02G330900
chr2D	IWGSC_v1.1_201706	gene	423438918	423442009	61	-	.	_Derived_from=TraesCS2D01G331000,PPRFinder_496;Name=TraesCS2D02G331000;_Primconf=HC;_Go=GO:0008270,GO:0005739,GO:0009507,GO:0010087,GO:0010305,GO:0010588,GO:0016556,GO:0031425,GO:0048513,GO:0090305;_Curating_team=IWGSC_steinn;_Manually_curated=yes;ID=TraesCS2D02G331000
chr2D	IWGSC_v1.1_201706	gene	423853301	423857387	62	+	.	_Previous_id=TraesCS2D01G331100;Name=TraesCS2D02G331100;_Primconf=HC;_Go=GO:0005506,GO:0009055,GO:0010012,GO:0016705,GO:0020037,GO:0005783,GO:0016021,GO:0006826,GO:0006879,GO:0009647,GO:0009741,GO:0009826,GO:0009867,GO:0009887,GO:0010358,GO:0016126,GO:0016132,GO:0022900,GO:0046165,GO:0048646,GO:0097305;ID=TraesCS2D02G331100
chr2D	IWGSC_v1.1_201706	gene	423860480	423865079	62	-	.	_Previous_id=TraesCS2D01G331200;Name=TraesCS2D02G331200;_Primconf=HC;_Go=GO:0003872,GO:0005524,GO:0005945,GO:0032991,GO:0006002,GO:0006007,GO:0044275,GO:0046164,GO:0046835,GO:0051704,GO:0061615;ID=TraesCS2D02G331200
chr2D	IWGSC_v1.1_201706	gene	423872279	423874904	62	+	.	_Previous_id=TraesCS2D01G331300;Name=TraesCS2D02G331300;_Primconf=HC;_Go=GO:0000902,GO:0006623,GO:0006888,GO:0007264,GO:0016049,GO:0061025,GO:0003924,GO:0005525,GO:0005576,GO:0005773,GO:0005794,GO:0005886,GO:0009507,GO:0031982;ID=TraesCS2D02G331300
chr2D	IWGSC_v1.1_201706	gene	423875706	423875876	41	-	.	_Previous_id=TraesCS2D01G331400;Name=TraesCS2D02G331400;_Primconf=HC;_Go=GO:0000387,GO:0007165,GO:0048731,GO:0016021;ID=TraesCS2D02G331400
chr2D	IWGSC_v1.1_201706	gene	423877709	423879904	56	-	.	_Previous_id=TraesCS2D01G331500;Name=TraesCS2D02G331500;_Primconf=HC;_Go=GO:0000085,GO:0000245,GO:0000278,GO:0000387,GO:0006626,GO:0009640,GO:0000338,GO:0022402,GO:0050789,GO:0000243,GO:0005682,GO:0005685,GO:0005686,GO:0005687,GO:0005689,GO:0005730,GO:0005774,GO:0005829,GO:0005886,GO:0034715,GO:0034719,GO:0071010,GO:0071011,GO:0071013,GO:0097526,GO:0003723;ID=TraesCS2D02G331500
chr2D	IWGSC_v1.1_201706	gene	423998757	424007578	59	-	.	_Previous_id=TraesCS2D01G331600;Name=TraesCS2D02G331600;_Primconf=HC;_Go=GO:0009627,GO:0010208,GO:0015908,GO:0034976,GO:0043161,GO:0051704,GO:0055088,GO:0071668,GO:1905039,GO:0009706,GO:0016021,GO:0015245;ID=TraesCS2D02G331600
chr2D	IWGSC_v1.1_201706	gene	424014056	424015658	52	-	.	_Previous_id=TraesCS2D01G331700;Name=TraesCS2D02G331700;_Primconf=HC;_Go=GO:0003677,GO:0003682,GO:0005634,GO:0016021,GO:0006351,GO:0006355,GO:0009751,GO:0048658;ID=TraesCS2D02G331700
chr2D	IWGSC_v1.1_201706	gene	424034969	424041892	.	-	.	_Derived_from=TraesCS2D01G331800,maker-chr2D-exonerate_est2genome-gene-1413.0;Name=TraesCS2D02G331800;_Old_locus_tag=Traes_2DL_11CEF7069,Traes_2DL_8A7142982;_Go=GO:0003333,GO:0015837,GO:0005275,GO:0015171,GO:0022804,GO:0005886,GO:0016021;_Curating_team=IWGSC_kingr;_Manually_curated=yes;ID=TraesCS2D02G331800
chr2D	IWGSC_v1.1_201706	gene	424637165	424638948	40	+	.	_Previous_id=TraesCS2D01G331900;Name=TraesCS2D02G331900;_Primconf=HC;_Go=GO:0003676,GO:0005634,GO:0006357,GO:0006366,GO:0007275;ID=TraesCS2D02G331900
chr2D	IWGSC_v1.1_201706	gene	424648963	424651518	57	-	.	_Previous_id=TraesCS2D01G332000;Name=TraesCS2D02G332000;_Primconf=HC;_Go=GO:0016021,GO:0032501,GO:0044237,GO:0044238,GO:0065007;ID=TraesCS2D02G332000
chr2D	IWGSC_v1.1_201706	gene	424852799	424860534	60	-	.	_Previous_id=TraesCS2D01G332100;Name=TraesCS2D02G332100;_Primconf=HC;_Go=GO:0003746,GO:0016874,GO:0006414,GO:0006469,GO:0006915,GO:0007399,GO:0009968,GO:0016310,GO:0035556,GO:0042981,GO:0043687,GO:0016021;ID=TraesCS2D02G332100
chr2D	IWGSC_v1.1_201706	gene	425158381	425159130	60	-	.	_Previous_id=TraesCS2D01G332200;Name=TraesCS2D02G332200;_Primconf=HC;_Go=GO:0000419,GO:0005666,GO:0005730,GO:0009507,GO:0016604,GO:0003677,GO:0003899,GO:0005507,GO:0048038,GO:0006351,GO:0009308,GO:0009889,GO:0016043,GO:0030154,GO:0031323,GO:0035194,GO:0042631,GO:0008152,GO:0048522,GO:0048523,GO:0048731,GO:0080090;ID=TraesCS2D02G332200
chr2D	IWGSC_v1.1_201706	gene	425215377	425219440	59	-	.	_Previous_id=TraesCS2D01G332300;Name=TraesCS2D02G332300;_Primconf=HC;_Go=GO:0003700,GO:0043565,GO:0005634,GO:0006351,GO:0006355,GO:0006950,GO:0009942,GO:0030010,GO:0042221;ID=TraesCS2D02G332300
chr2D	IWGSC_v1.1_201706	gene	425493763	425494530	60	-	.	_Previous_id=TraesCS2D01G332400;Name=TraesCS2D02G332400;_Primconf=HC;_Go=GO:0004773,GO:0030247,GO:0005794,GO:0009505,GO:0009506,GO:0016021,GO:0046658,GO:0007155,GO:0009834,GO:0009913,GO:0010054,GO:0016132,GO:0046165,GO:0048513,GO:0048646,GO:0050896,GO:0090376;ID=TraesCS2D02G332400
chr2D	IWGSC_v1.1_201706	gene	425740309	425746371	63	+	.	_Previous_id=TraesCS2D01G332500;Name=TraesCS2D02G332500;_Primconf=HC;_Go=GO:0000272,GO:0005982,GO:0006071,GO:0006468,GO:0007155,GO:0009832,GO:0009860,GO:0009886,GO:0009913,GO:0010075,GO:0010090,GO:0010442,GO:0016051,GO:0016126,GO:0030048,GO:0035295,GO:0042545,GO:0016052,GO:0045010,GO:0046165,GO:0048513,GO:0048646,GO:0048767,GO:0050896,GO:0052541,GO:0052546,GO:2000026,GO:0005488,GO:0008889,GO:0009…
chr2D	IWGSC_v1.1_201706	gene	426420007	426429108	48	+	.	_Previous_id=TraesCS2D01G332600;Name=TraesCS2D02G332600;_Primconf=HC;_Go=GO:0000166,GO:0008143,GO:0000398,GO:0006412,GO:0006486,GO:0043488,GO:0005975,GO:1900364,GO:0005634,GO:0005737,GO:0019028;ID=TraesCS2D02G332600
chr2D	IWGSC_v1.1_201706	gene	426429855	426432882	63	+	.	_Previous_id=TraesCS2D01G332700;Name=TraesCS2D02G332700;_Primconf=HC;_Go=GO:0000271,GO:0001558,GO:0002237,GO:0006468,GO:0007020,GO:0007165,GO:0007389,GO:0008361,GO:0009664,GO:0009825,GO:0009832,GO:0009886,GO:0009887,GO:0009913,GO:0009926,GO:0009932,GO:0009965,GO:0010067,GO:0010075,GO:0010103,GO:0030155,GO:0043481,GO:0048569,GO:0048646,GO:0048653,GO:0048767,GO:0050832,GO:0051302,GO:0051704,GO:2000…
chr2D	IWGSC_v1.1_201706	gene	426433371	426434942	60	-	.	_Previous_id=TraesCS2D01G332800;Name=TraesCS2D02G332800;_Primconf=HC;_Go=GO:0006810,GO:0008152,GO:0033036,GO:0009987,GO:0048731,GO:0050794,GO:0050896,GO:0016021,GO:0043231,GO:0016787;ID=TraesCS2D02G332800
chr2D	IWGSC_v1.1_201706	gene	426920248	426921985	60	+	.	_Previous_id=TraesCS2D01G332900;Name=TraesCS2D02G332900;_Primconf=HC;_Go=GO:0003841,GO:0004366,GO:0090447,GO:0005739,GO:0005783,GO:0009536,GO:0016021,GO:0044422,GO:0006655,GO:0016024,GO:0032787,GO:0042180,GO:0044283,GO:0048235,GO:0080167;ID=TraesCS2D02G332900
chr2D	IWGSC_v1.1_201706	gene	426926283	426929941	47	+	.	_Previous_id=TraesCS2D01G333000;Name=TraesCS2D02G333000;_Primconf=HC;_Go=GO:0004386,GO:0005488,GO:0005634,GO:0016021,GO:0007275,GO:0009987,GO:0051783,GO:1904667;ID=TraesCS2D02G333000
chr2D	IWGSC_v1.1_201706	gene	426938492	426939990	33	-	.	_Previous_id=TraesCS2D01G333200;Name=TraesCS2D02G333200;_Primconf=HC;_Go=GO:0005634,GO:0016021,GO:0043232,GO:0044422,GO:0044444,GO:0006351,GO:0016570,GO:0019219,GO:0043687,GO:0009987,GO:0032502,GO:0048856,GO:0050896,GO:0051276,GO:0060255,GO:0016787;ID=TraesCS2D02G333200
chr2D	IWGSC_v1.1_201706	gene	426942233	426945417	60	+	.	_Previous_id=TraesCS2D01G333300;Name=TraesCS2D02G333300;_Primconf=HC;_Go=GO:0005509,GO:0005544,GO:0016740,GO:0005618,GO:0005783,GO:0005886,GO:0009506,GO:0016021,GO:0009908,GO:0009911,GO:0009987,GO:0010075,GO:0010228,GO:0015031,GO:0023052,GO:0048513,GO:0050794,GO:0051649;ID=TraesCS2D02G333300
chr2D	IWGSC_v1.1_201706	gene	426946532	426947334	42	-	.	_Previous_id=TraesCS2D01G333400;Name=TraesCS2D02G333400;_Primconf=HC;_Go=GO:0031323,GO:0044237,GO:0048513;ID=TraesCS2D02G333400
chr2D	IWGSC_v1.1_201706	gene	427096483	427097514	39	-	.	_Previous_id=TraesCS2D01G333500;Name=TraesCS2D02G333500;_Primconf=HC;_Go=GO:0006355,GO:0006468,GO:0006996,GO:0007275,GO:0051641,GO:0008270,GO:0016021;ID=TraesCS2D02G333500
chr2D	IWGSC_v1.1_201706	gene	427112885	427121532	46	-	.	_Previous_id=TraesCS2D01G333600;Name=TraesCS2D02G333600;_Primconf=HC;_Go=GO:0004096,GO:0020037,GO:0031177,GO:0006979,GO:0019752,GO:0042180,GO:0044238,GO:0055114;ID=TraesCS2D02G333600
chr2D	IWGSC_v1.1_201706	gene	427328272	427336645	53	-	.	_Previous_id=TraesCS2D01G333700;Name=TraesCS2D02G333700;_Primconf=HC;_Go=GO:0043169,GO:0047668,GO:0050224,GO:0005576,GO:0005794,GO:0009505,GO:0016021,GO:0005975,GO:0006950,GO:0009860,GO:0035295,GO:0044237,GO:0008152,GO:0048646,GO:0065007;ID=TraesCS2D02G333700
chr2D	IWGSC_v1.1_201706	gene	427442427	427446136	61	-	.	_Previous_id=TraesCS2D01G333800;Name=TraesCS2D02G333800;_Primconf=HC;_Go=GO:0047668,GO:0050224,GO:0005975,GO:0006950,GO:0009860,GO:0035295,GO:0044237,GO:0008152,GO:0048646,GO:0065007,GO:0009505,GO:0016021;ID=TraesCS2D02G333800
chr2D	IWGSC_v1.1_201706	gene	427570824	427572481	41	+	.	_Previous_id=TraesCS2D01G333900;Name=TraesCS2D02G333900;_Primconf=HC;_Go=GO:0003735,GO:0008422,GO:0046872,GO:0005634,GO:0016021,GO:1990904,GO:0007165,GO:0009725,GO:0048364,GO:1901657;ID=TraesCS2D02G333900
chr2D	IWGSC_v1.1_201706	gene	427575985	427576515	47	-	.	_Previous_id=TraesCS2D01G334000;Name=TraesCS2D02G334000;_Primconf=HC;_Go=GO:0005488,GO:0016021,GO:0032502,GO:0044237,GO:0044238,GO:0050789;ID=TraesCS2D02G334000
chr2D	IWGSC_v1.1_201706	gene	427607782	427613562	59	+	.	_Previous_id=TraesCS2D01G334100;Name=TraesCS2D02G334100;_Primconf=HC;_Go=GO:0003676,GO:0003964,GO:0016787,GO:0005634,GO:0016021,GO:0030686,GO:0030688,GO:0006278,GO:0006364,GO:0006810,GO:0008150;ID=TraesCS2D02G334100
chr2D	IWGSC_v1.1_201706	gene	427617532	427618209	39	+	.	_Previous_id=TraesCS2D01G334200;Name=TraesCS2D02G334200;_Primconf=HC;_Go=GO:0003677,GO:0005634,GO:0006351,GO:0006355,GO:0042221,GO:0048513;ID=TraesCS2D02G334200
chr2D	IWGSC_v1.1_201706	gene	427898109	427898699	40	+	.	_Previous_id=TraesCS2D01G334300;Name=TraesCS2D02G334300;_Primconf=HC;_Go=GO:0003677,GO:0005634,GO:0006351,GO:0006355,GO:0048731,GO:0050896;ID=TraesCS2D02G334300
chr2D	IWGSC_v1.1_201706	gene	427909803	427910690	31	+	.	_Previous_id=TraesCS2D01G334400;Name=TraesCS2D02G334400;_Primconf=HC;_Go=GO:0003006,GO:0006351,GO:0006355,GO:0048513,GO:0003677,GO:0005634;ID=TraesCS2D02G334400
chr2D	IWGSC_v1.1_201706	gene	427915243	427915822	23	+	.	_Previous_id=TraesCS2D01G334500;Name=TraesCS2D02G334500;_Primconf=HC;_Go=GO:0003677,GO:0005634,GO:0006351,GO:0006355,GO:0048731,GO:0050896;ID=TraesCS2D02G334500
chr2D	IWGSC_v1.1_201706	gene	427925601	427926218	31	+	.	_Previous_id=TraesCS2D01G334600;Name=TraesCS2D02G334600;_Primconf=HC;_Go=GO:0003006,GO:0006351,GO:0006355,GO:0048513,GO:0050896,GO:0003677,GO:0003824,GO:0005634,GO:0005737,GO:0012505,GO:0016020;ID=TraesCS2D02G334600
chr2D	IWGSC_v1.1_201706	gene	427946437	427948526	26	+	.	_Previous_id=TraesCS2D01G334700;Name=TraesCS2D02G334700;_Primconf=HC;_Go=GO:0004526,GO:0005507,GO:0016491,GO:0005655,GO:0006950,GO:0009058,GO:0031047,GO:0043170,GO:0044237,GO:0044238,GO:0050794,GO:0051716;ID=TraesCS2D02G334700
chr2D	IWGSC_v1.1_201706	gene	427951525	427953414	51	+	.	_Previous_id=TraesCS2D01G334800;Name=TraesCS2D02G334800;_Primconf=HC;_Go=GO:0003677,GO:0005634,GO:0006351,GO:0006355,GO:0042221,GO:0048513;ID=TraesCS2D02G334800
chr2D	IWGSC_v1.1_201706	gene	427953767	427955618	52	-	.	_Previous_id=TraesCS2D01G334900;Name=TraesCS2D02G334900;_Primconf=HC;_Go=GO:0000373,GO:0009451,GO:0009658,GO:0050896,GO:0090305,GO:0003723,GO:0004519,GO:0008270,GO:0009507;ID=TraesCS2D02G334900
chr2D	IWGSC_v1.1_201706	gene	427956960	427958642	62	-	.	_Previous_id=TraesCS2D01G335000;Name=TraesCS2D02G335000;_Primconf=HC;_Go=GO:0005634,GO:0005737,GO:0006612,GO:0009852,GO:0009963,GO:0010363,GO:0019748,GO:0019752,GO:0030003,GO:0031328,GO:0044249,GO:0044255,GO:0050896,GO:0055114,GO:0070838,GO:1900378,GO:2000762,GO:0016702,GO:0016707,GO:0046872;ID=TraesCS2D02G335000
chr2D	IWGSC_v1.1_201706	gene	427969622	427974376	38	-	.	_Previous_id=TraesCS2D01G335100;Name=TraesCS2D02G335100;_Primconf=HC;_Go=GO:0006139,GO:0044260,GO:0050789;ID=TraesCS2D02G335100
chr2D	IWGSC_v1.1_201706	gene	428552674	428556392	61	+	.	_Previous_id=TraesCS2D01G335200;Name=TraesCS2D02G335200;_Primconf=HC;_Go=GO:0000271,GO:0006023,GO:0006468,GO:0009743,GO:0010200,GO:0034645,GO:0042546,GO:0044036,GO:0044262,GO:0046907,GO:0048193,GO:0061025,GO:0004672,GO:0005524,GO:0016021;ID=TraesCS2D02G335200
chr2D	IWGSC_v1.1_201706	gene	428558768	428565318	61	-	.	_Previous_id=TraesCS2D01G335300;Name=TraesCS2D02G335300;_Primconf=HC;_Go=GO:0005507,GO:0008131,GO:0048038,GO:0005777,GO:0016021,GO:0009308,GO:0009987,GO:0050896,GO:0051179,GO:0055114,GO:0065008;ID=TraesCS2D02G335300
chr2D	IWGSC_v1.1_201706	gene	428659430	428663037	55	-	.	_Previous_id=TraesCS2D01G335400;Name=TraesCS2D02G335400;_Primconf=HC;_Go=GO:0009987,GO:0050794;ID=TraesCS2D02G335400
chr2D	IWGSC_v1.1_201706	gene	428867436	428872400	62	+	.	_Previous_id=TraesCS2D01G335600;Name=TraesCS2D02G335600;_Primconf=HC;_Go=GO:0004609,GO:0004842,GO:0005524,GO:0016301,GO:0016787,GO:0016874,GO:0005634,GO:0005739,GO:0016021,GO:0009653,GO:0010152,GO:0016310,GO:0019722,GO:0006511,GO:0048015;ID=TraesCS2D02G335600
chr2D	IWGSC_v1.1_201706	gene	429053162	429057812	59	+	.	_Previous_id=TraesCS2D01G335700;Name=TraesCS2D02G335700;_Primconf=HC;_Go=GO:0005488,GO:0008526,GO:0005794,GO:0005886,GO:0009506,GO:0016021,GO:0009908,GO:0009913,GO:0015914,GO:0044237,GO:0044238,GO:0048527,GO:0048569,GO:0048646,GO:0048768;ID=TraesCS2D02G335700
chr2D	IWGSC_v1.1_201706	gene	429083170	429086427	62	+	.	_Previous_id=TraesCS2D01G335800;Name=TraesCS2D02G335800;_Primconf=HC;_Go=GO:0004674,GO:0005886,GO:0007165,GO:0009693,GO:0016132,GO:0046165,GO:0046777,GO:0048731,GO:0055046;ID=TraesCS2D02G335800
chr2D	IWGSC_v1.1_201706	gene	429091154	429096061	50	-	.	_Previous_id=TraesCS2D01G335900;Name=TraesCS2D02G335900;_Primconf=HC;_Go=GO:0007275,GO:0023052,GO:0044237,GO:0050794,GO:0008270,GO:0016021;ID=TraesCS2D02G335900
chr2D	IWGSC_v1.1_201706	gene	429374194	429374688	46	-	.	_Previous_id=TraesCS2D01G336000;Name=TraesCS2D02G336000;_Primconf=HC;_Go=GO:0007626,GO:0030595,GO:0050789,GO:0016021;ID=TraesCS2D02G336000
chr2D	IWGSC_v1.1_201706	gene	429377673	429379886	47	-	.	_Derived_from=TraesCS2D01G336100,PPRFinder_497;Name=TraesCS2D02G336100;_Primconf=HC;_Go=GO:0000966,GO:0006351,GO:0009451,GO:0009793,GO:0009845,GO:0009886,GO:0010103,GO:0090305,GO:0003723,GO:0004519,GO:0005634,GO:0005739,GO:0009507;_Curating_team=IWGSC_steinn;_Manually_curated=yes;ID=TraesCS2D02G336100
chr2D	IWGSC_v1.1_201706	gene	429476368	429476868	30	-	.	_Previous_id=TraesCS2D01G336200;Name=TraesCS2D02G336200;_Primconf=HC;_Go=GO:0004129,GO:0005507,GO:0005743,GO:0016021,GO:0070469,GO:0022900,GO:0044238,GO:1902600;ID=TraesCS2D02G336200
chr2D	IWGSC_v1.1_201706	gene	429689385	429694296	32	-	.	_Previous_id=TraesCS2D01G336300;Name=TraesCS2D02G336300;_Primconf=HC;_Go=GO:0003677,GO:0005634,GO:0006351,GO:0006355,GO:0006996,GO:0007049,GO:0032502,GO:0033554,GO:0043687,GO:0051726;ID=TraesCS2D02G336300
chr2D	IWGSC_v1.1_201706	gene	429833826	429838995	43	-	.	_Previous_id=TraesCS2D01G336400;Name=TraesCS2D02G336400;_Primconf=HC;_Go=GO:0003677,GO:0005634,GO:0006351,GO:0006355,GO:0007049,GO:0033554;ID=TraesCS2D02G336400
chr2D	IWGSC_v1.1_201706	gene	429923402	429928540	43	-	.	_Previous_id=TraesCS2D01G336500;Name=TraesCS2D02G336500;_Primconf=HC;_Go=GO:0003677,GO:0005634,GO:0006351,GO:0006355,GO:0007049,GO:0032502,GO:0033554,GO:0043687;ID=TraesCS2D02G336500
chr2D	IWGSC_v1.1_201706	gene	430003914	430007508	55	-	.	_Previous_id=TraesCS2D01G336600;Name=TraesCS2D02G336600;_Primconf=HC;_Go=GO:0003830,GO:0006412,GO:0006487,GO:0006950,GO:0005975,GO:0050794,GO:0051179,GO:0016021,GO:0044464;ID=TraesCS2D02G336600
chr2D	IWGSC_v1.1_201706	gene	430021281	430023065	48	-	.	_Previous_id=TraesCS2D01G336700;Name=TraesCS2D02G336700;_Primconf=HC;_Go=GO:0005829,GO:0005886,GO:0009941,GO:0016021,GO:0006950,GO:0009734,GO:0009820,GO:0044237,GO:0044238,GO:0055114,GO:0050236;ID=TraesCS2D02G336700
chr2D	IWGSC_v1.1_201706	gene	430432474	430434371	59	-	.	_Previous_id=TraesCS2D01G336800;Name=TraesCS2D02G336800;_Primconf=HC;_Go=GO:0005829,GO:0005886,GO:0009941,GO:0016021,GO:0006950,GO:0009734,GO:0009820,GO:0044237,GO:0044238,GO:0055114,GO:0050236;ID=TraesCS2D02G336800
chr2D	IWGSC_v1.1_201706	gene	430439899	430441968	53	-	.	_Previous_id=TraesCS2D01G336900;Name=TraesCS2D02G336900;_Primconf=HC;_Go=GO:0005829,GO:0005886,GO:0009941,GO:0016021,GO:0006950,GO:0009734,GO:0009820,GO:0044237,GO:0044238,GO:0055114,GO:0050236;ID=TraesCS2D02G336900
chr2D	IWGSC_v1.1_201706	gene	430454869	430460617	62	+	.	_Previous_id=TraesCS2D01G337000;Name=TraesCS2D02G337000;_Primconf=HC;_Go=GO:0000239,GO:0001556,GO:0006302,GO:0006366,GO:0007130,GO:0007131,GO:0007141,GO:0007144,GO:0007286,GO:0032501,GO:0050794,GO:0051327,GO:0001673,GO:0005694,GO:0005739,GO:0005856,GO:0012505,GO:0016021,GO:0031975,GO:0032991,GO:0044422,GO:1902494,GO:0005524,GO:0008568,GO:0016740,GO:0042802;ID=TraesCS2D02G337000
chr2D	IWGSC_v1.1_201706	gene	430461648	430464878	60	-	.	_Previous_id=TraesCS2D01G337100;Name=TraesCS2D02G337100;_Primconf=HC;_Go=GO:0000287,GO:0004449,GO:0051287,GO:0009295,GO:0030062,GO:0043232,GO:0045242,GO:0048046,GO:0006007,GO:0006096,GO:0006098,GO:0006099,GO:0006102,GO:0006740,GO:0007030,GO:0007033,GO:0009651,GO:0009853,GO:0042180,GO:0044106,GO:0046356,GO:0046686;ID=TraesCS2D02G337100
chr2D	IWGSC_v1.1_201706	gene	430465466	430468969	43	-	.	_Previous_id=TraesCS2D01G337200;Name=TraesCS2D02G337200;_Primconf=HC;_Go=GO:0004672,GO:0005524,GO:0006139,GO:0006468,GO:0006950,GO:0032502,GO:0050789,GO:0051716,GO:0016021;ID=TraesCS2D02G337200
chr2D	IWGSC_v1.1_201706	gene	430601097	430605284	58	+	.	_Previous_id=TraesCS2D01G337300;Name=TraesCS2D02G337300;_Primconf=HC;_Go=GO:0003743,GO:0006413,GO:0009630,GO:0016043,GO:0032501,GO:0008152,GO:0050789;ID=TraesCS2D02G337300
chr2D	IWGSC_v1.1_201706	gene	430616707	430623011	62	+	.	_Previous_id=TraesCS2D01G337400;Name=TraesCS2D02G337400;_Primconf=HC;_Go=GO:0003677,GO:0003682,GO:0006338,GO:0006357,GO:0006366,GO:0009560,GO:0010605,GO:0040029,GO:0045893,GO:0048573,GO:0051276,GO:0016514;ID=TraesCS2D02G337400
chr2D	IWGSC_v1.1_201706	gene	430623571	430627037	58	+	.	_Previous_id=TraesCS2D01G337500;Name=TraesCS2D02G337500;_Primconf=HC;_Go=GO:0000139,GO:0005634,GO:0003677,GO:0016757,GO:0006508,GO:0006950,GO:0044237,GO:0045489,GO:0065007,GO:0071555;ID=TraesCS2D02G337500
chr2D	IWGSC_v1.1_201706	gene	431380769	431385887	49	-	.	_Previous_id=TraesCS2D01G337600;Name=TraesCS2D02G337600;_Primconf=HC;_Go=GO:0000228,GO:0005737,GO:0005856,GO:0032991,GO:0003677,GO:0003824,GO:0006139,GO:0006955,GO:0006996,GO:0007275,GO:0009889,GO:0010467,GO:0019219,GO:0022414,GO:0034645,GO:0048519,GO:0048869,GO:0051234;ID=TraesCS2D02G337600
chr2D	IWGSC_v1.1_201706	gene	431425673	431429066	37	-	.	_Previous_id=TraesCS2D01G337700;Name=TraesCS2D02G337700;_Primconf=HC;_Go=GO:0000228,GO:0005737,GO:0005856,GO:0032991,GO:0003677,GO:0003824,GO:0006139,GO:0007275,GO:0010467,GO:0044260,GO:0009987,GO:0050794,GO:0051171;ID=TraesCS2D02G337700
chr2D	IWGSC_v1.1_201706	gene	431501957	431503685	63	-	.	_Previous_id=TraesCS2D01G337800;Name=TraesCS2D02G337800;_Primconf=HC;_Go=GO:0000162,GO:0009641,GO:0009682,GO:0009684,GO:0009759,GO:0009835,GO:0010114,GO:0016138,GO:0051704,GO:0052544,GO:0055114,GO:0005506,GO:0009055,GO:0016709,GO:0020037,GO:0005739,GO:0005789,GO:0005886,GO:0016021,GO:0031090;ID=TraesCS2D02G337800
chr2D	IWGSC_v1.1_201706	gene	431513086	431515194	60	-	.	_Derived_from=TraesCS2D01G337900,PPRFinder_498;Name=TraesCS2D02G337900;_Primconf=HC;_Go=GO:0004519,GO:0008270,GO:0016740,GO:0005739,GO:0005856,GO:0009507,GO:0016021,GO:0031975,GO:0042995,GO:0032991,GO:0044428,GO:0009451,GO:0031425,GO:0044249,GO:0009987,GO:0050794,GO:0090305;_Curating_team=IWGSC_steinn;_Manually_curated=yes;ID=TraesCS2D02G337900
chr2D	IWGSC_v1.1_201706	gene	431515297	431518904	62	+	.	_Previous_id=TraesCS2D01G338000;Name=TraesCS2D02G338000;_Primconf=HC;_Go=GO:0004553,GO:0005975,GO:0006325,GO:0006996,GO:0010468,GO:0016070,GO:0043414,GO:0043687,GO:0044281,GO:0016021;ID=TraesCS2D02G338000
chr2D	IWGSC_v1.1_201706	gene	431674102	431676952	62	+	.	_Previous_id=TraesCS2D01G338100;Name=TraesCS2D02G338100;_Primconf=HC;_Go=GO:0004553,GO:0043169,GO:0005975,GO:0006793,GO:0007186,GO:0007275,GO:0009653,GO:0010646,GO:0016043,GO:0035556,GO:0043412,GO:0044267,GO:0008152,GO:0048518,GO:0048869,GO:0009507,GO:0016021;ID=TraesCS2D02G338100
chr2D	IWGSC_v1.1_201706	gene	431676823	431681015	62	-	.	_Previous_id=TraesCS2D01G338200;Name=TraesCS2D02G338200;_Primconf=HC;_Go=GO:0047268,GO:0047274,GO:0052692,GO:0006979,GO:0009987,GO:0034484,GO:0080167,GO:0009506,GO:0016020;ID=TraesCS2D02G338200
chr2D	IWGSC_v1.1_201706	gene	431919912	431922978	52	+	.	_Previous_id=TraesCS2D01G338300;Name=TraesCS2D02G338300;_Primconf=HC;_Go=GO:0006952,GO:0007165,GO:0008284,GO:0009653,GO:0017148,GO:0022402,GO:0022607,GO:0030154,GO:0034641,GO:0034645,GO:0044238,GO:0048513,GO:0016021,GO:0030598;ID=TraesCS2D02G338300
chr2D	IWGSC_v1.1_201706	gene	431923476	431926660	60	-	.	_Previous_id=TraesCS2D01G338400;Name=TraesCS2D02G338400;_Primconf=HC;_Go=GO:0000166,GO:0003676,GO:0004672,GO:0046872,GO:0006351,GO:0009653,GO:0009888,GO:0010468,GO:0016567,GO:0018108,GO:0022008,GO:0031326,GO:0048468,GO:0048513,GO:0050896,GO:0051179,GO:0051225,GO:0051253,GO:0016021,GO:0070652;ID=TraesCS2D02G338400
chr2D	IWGSC_v1.1_201706	gene	431968691	431969762	55	+	.	_Previous_id=TraesCS2D01G338500;Name=TraesCS2D02G338500;_Primconf=HC;_Go=GO:0000023,GO:0016556,GO:0019252,GO:0032259,GO:0044281,GO:0005737,GO:0008168;ID=TraesCS2D02G338500
chr2D	IWGSC_v1.1_201706	gene	432000325	432000831	36	+	.	_Previous_id=TraesCS2D01G338600;Name=TraesCS2D02G338600;_Primconf=HC;_Go=GO:0004519,GO:0005634,GO:0005694,GO:0005789,GO:0006807,GO:0007275,GO:0044238,GO:0044249,GO:0044260,GO:0050794,GO:0051641;ID=TraesCS2D02G338600
chr2D	IWGSC_v1.1_201706	gene	432033385	432035834	54	-	.	_Previous_id=TraesCS2D01G338700;Name=TraesCS2D02G338700;_Primconf=HC;_Go=GO:0004719,GO:0005634,GO:0005829,GO:0006479,GO:0034641,GO:0043687,GO:0044281;ID=TraesCS2D02G338700
chr2D	IWGSC_v1.1_201706	gene	432036105	432038189	48	-	.	_Previous_id=TraesCS2D01G338800;Name=TraesCS2D02G338800;_Primconf=HC;_Go=GO:0000712,GO:0006281,GO:0006355,GO:0006520,GO:0006661,GO:0007129,GO:0031297,GO:0051382,GO:0003690,GO:0043240,GO:0071821;ID=TraesCS2D02G338800
chr2D	IWGSC_v1.1_201706	gene	432079449	432081115	61	-	.	_Previous_id=TraesCS2D01G338900;Name=TraesCS2D02G338900;_Primconf=HC;_Go=GO:0005886,GO:0016021,GO:0006139,GO:0006468,GO:0009733,GO:0009741,GO:0016043,GO:0008152,GO:0050794,GO:0097305,GO:0016905;ID=TraesCS2D02G338900
chr2D	IWGSC_v1.1_201706	gene	432851965	432856207	58	+	.	_Previous_id=TraesCS2D01G339000;Name=TraesCS2D02G339000;_Primconf=HC;_Go=GO:0005524,GO:0010329,GO:0042626,GO:0005886,GO:0009506,GO:0016021,GO:0009154,GO:0009207,GO:0009734,GO:0010048,GO:0010315,GO:0010540,GO:0010541,GO:0043481,GO:0045893,GO:0046034,GO:0046130,GO:0048440,GO:0048569,GO:0055085;ID=TraesCS2D02G339000
chr2D	IWGSC_v1.1_201706	gene	433015241	433022341	46	+	.	_Previous_id=TraesCS2D01G339100;Name=TraesCS2D02G339100;_Primconf=HC;_Go=GO:0000166,GO:0003676,GO:0004672,GO:0046872,GO:0006468,GO:0009416,GO:0009733,GO:0051225,GO:0016021,GO:0070652;ID=TraesCS2D02G339100
chr2D	IWGSC_v1.1_201706	gene	433023533	433026300	42	-	.	_Previous_id=TraesCS2D01G339200;Name=TraesCS2D02G339200;_Primconf=HC;_Go=GO:0030598,GO:0006952,GO:0009059,GO:0017148,GO:0044249,GO:0044260,GO:0090304,GO:0016021;ID=TraesCS2D02G339200
chr2D	IWGSC_v1.1_201706	gene	433213478	433221116	60	-	.	_Previous_id=TraesCS2D01G339300;Name=TraesCS2D02G339300;_Primconf=HC;_Go=GO:0005739,GO:0016021,GO:0009058,GO:0033617,GO:0044238,GO:0044260;ID=TraesCS2D02G339300
chr2D	IWGSC_v1.1_201706	gene	433501581	433508969	56	+	.	_Previous_id=TraesCS2D01G339400;Name=TraesCS2D02G339400;_Primconf=HC;_Go=GO:0000394,GO:0006366,GO:0006370,GO:0006412,GO:0006486,GO:0007049,GO:0008284,GO:0009615,GO:0009630,GO:0009908,GO:0009913,GO:0010090,GO:0034243,GO:0005975,GO:0045737,GO:0045944,GO:0048366,GO:0048513,GO:0050792,GO:0051301,GO:0051704,GO:0070816,GO:1901409,GO:0005829,GO:0008024,GO:0016538,GO:0019901;ID=TraesCS2D02G339400
chr2D	IWGSC_v1.1_201706	gene	433509063	433510605	60	-	.	_Previous_id=TraesCS2D01G339500;Name=TraesCS2D02G339500;_Primconf=HC;_Go=GO:0006066,GO:0016127,GO:0016570,GO:0034434,GO:0050789,GO:0055114,GO:0047196,GO:0016021;ID=TraesCS2D02G339500
chr2D	IWGSC_v1.1_201706	gene	433666403	433668362	61	-	.	_Previous_id=TraesCS2D01G339600;Name=TraesCS2D02G339600;_Primconf=HC;_Go=GO:0000902,GO:0006464,GO:0006546,GO:0009416,GO:0009651,GO:0016049,GO:0030091,GO:0034599,GO:0034641,GO:0045892,GO:0046907,GO:0048193,GO:0055114,GO:0061025,GO:0080167,GO:0005488,GO:0008113,GO:0033744,GO:0005739,GO:0005829,GO:0009570,GO:0009941;ID=TraesCS2D02G339600
chr2D	IWGSC_v1.1_201706	gene	433863063	433865190	61	+	.	_Previous_id=TraesCS2D01G339700;Name=TraesCS2D02G339700;_Primconf=HC;_Go=GO:0003712,GO:0004402,GO:0005516,GO:0008270,GO:0005634,GO:0005737,GO:0006355,GO:0007623,GO:0009058,GO:0009409,GO:0009553,GO:0009555,GO:0009611,GO:0009651,GO:0009734,GO:0009738,GO:0009751,GO:0009753,GO:0010167,GO:0010182,GO:0016567,GO:0016573,GO:0042542,GO:0008152,GO:0051276,GO:0051973,GO:0080134;ID=TraesCS2D02G339700
chr2D	IWGSC_v1.1_201706	gene	433866824	433876377	48	-	.	_Previous_id=TraesCS2D01G339800;Name=TraesCS2D02G339800;_Primconf=HC;_Go=GO:0000786,GO:0005634,GO:0005819,GO:0016020,GO:0003677,GO:0004672,GO:0005524,GO:0046982,GO:0006139,GO:0006325,GO:0006468,GO:0006996,GO:0007049,GO:0034645,GO:0043687,GO:0048316,GO:0050794,GO:0051171,GO:0060255;ID=TraesCS2D02G339800
chr2D	IWGSC_v1.1_201706	gene	434138340	434140330	62	+	.	_Previous_id=TraesCS2D01G339900;Name=TraesCS2D02G339900;_Primconf=HC;_Go=GO:0003712,GO:0004402,GO:0005516,GO:0008270,GO:0005634,GO:0005737,GO:0006139,GO:0006355,GO:0007623,GO:0009058,GO:0009409,GO:0009553,GO:0009555,GO:0009611,GO:0009651,GO:0009734,GO:0009738,GO:0009751,GO:0009753,GO:0010167,GO:0010182,GO:0016567,GO:0016573,GO:0042542,GO:0008152,GO:0051276,GO:0051973,GO:0080134;ID=TraesCS2D02G339…
chr2D	IWGSC_v1.1_201706	gene	434354623	434355470	51	-	.	_Previous_id=TraesCS2D01G340000;Name=TraesCS2D02G340000;_Primconf=HC;_Go=GO:0005488,GO:0008152,GO:0009987,GO:0051179,GO:0016021;ID=TraesCS2D02G340000
chr2D	IWGSC_v1.1_201706	gene	434356900	434359958	61	-	.	_Previous_id=TraesCS2D01G340100;Name=TraesCS2D02G340100;_Primconf=HC;_Go=GO:0004222,GO:0004672,GO:0005739,GO:0009507,GO:0006259,GO:0006508,GO:0006950;ID=TraesCS2D02G340100
chr2D	IWGSC_v1.1_201706	gene	434675422	434688514	50	-	.	_Previous_id=TraesCS2D01G340200;Name=TraesCS2D02G340200;_Primconf=HC;_Go=GO:0004222,GO:0004672,GO:0006259,GO:0006508,GO:0006950;ID=TraesCS2D02G340200
chr2D	IWGSC_v1.1_201706	gene	435039164	435045170	59	+	.	_Previous_id=TraesCS2D01G340400;Name=TraesCS2D02G340400;_Primconf=HC;_Go=GO:0003689,GO:0003887,GO:0005524,GO:0005634,GO:0005663,GO:0009360,GO:0006261,GO:0006281,GO:0008152;ID=TraesCS2D02G340400
chr2D	IWGSC_v1.1_201706	gene	435047157	435049200	37	-	.	_Previous_id=TraesCS2D01G340500;Name=TraesCS2D02G340500;_Primconf=HC;_Go=GO:0000785,GO:0005634,GO:0005743,GO:0005829,GO:0016021,GO:0004842,GO:0016874,GO:0046872,GO:0006007,GO:0006974,GO:0007283,GO:0009649,GO:0010224,GO:0016567,GO:0019222,GO:0050790,GO:0050794;ID=TraesCS2D02G340500
chr2D	IWGSC_v1.1_201706	gene	435070225	435072633	53	-	.	_Previous_id=TraesCS2D01G340600;Name=TraesCS2D02G340600;_Primconf=HC;_Go=GO:0004497,GO:0005506,GO:0009055,GO:0016705,GO:0020037,GO:0016021,GO:0044237,GO:0044238,GO:0044281,GO:0050896,GO:0055114;ID=TraesCS2D02G340600
chr2D	IWGSC_v1.1_201706	gene	435073758	435078908	58	-	.	_Previous_id=TraesCS2D01G340700;Name=TraesCS2D02G340700;_Primconf=HC;_Go=GO:0005488,GO:0008168,GO:0016853,GO:0005654,GO:0005794,GO:0005829,GO:0016021,GO:0006351,GO:0006355,GO:0006950,GO:0009734,GO:0009744,GO:0009750,GO:0010558,GO:0010629,GO:0010646,GO:0031327,GO:0032259,GO:0035556,GO:0043549,GO:0043687,GO:0032502,GO:0051172;ID=TraesCS2D02G340700
chr2D	IWGSC_v1.1_201706	gene	435147053	435148828	58	-	.	_Previous_id=TraesCS2D01G340800;Name=TraesCS2D02G340800;_Primconf=HC;_Go=GO:0000166,GO:0003729,GO:0005739,GO:0005829,GO:0016021,GO:0006378,GO:0006661,GO:0006996,GO:0048576,GO:0048578,GO:0051234;ID=TraesCS2D02G340800
chr2D	IWGSC_v1.1_201706	gene	435196765	435198153	60	+	.	_Previous_id=TraesCS2D01G340900;Name=TraesCS2D02G340900;_Primconf=HC;_Go=GO:0019222,GO:0034645,GO:0044267,GO:0050794,GO:0090304;ID=TraesCS2D02G340900
chr2D	IWGSC_v1.1_201706	gene	435209985	435210533	33	+	.	_Previous_id=TraesCS2D01G341000;Name=TraesCS2D02G341000;_Primconf=HC;_Go=GO:0008270,GO:0010467,GO:0034645,GO:0050794,GO:0050896,GO:0060255,GO:0090304,GO:0016021;ID=TraesCS2D02G341000
chr2D	IWGSC_v1.1_201706	gene	435221844	435225384	52	+	.	_Previous_id=TraesCS2D01G341100;Name=TraesCS2D02G341100;_Primconf=HC;_Go=GO:0005829,GO:0009409,GO:0009651,GO:0010228,GO:0010467,GO:0019222,GO:0034645,GO:0050794,GO:0090304,GO:0051087;ID=TraesCS2D02G341100
chr2D	IWGSC_v1.1_201706	gene	435923807	435928278	46	+	.	_Previous_id=TraesCS2D01G341200;Name=TraesCS2D02G341200;_Primconf=HC;_Go=GO:0003824,GO:0008536,GO:0008565,GO:0006606,GO:0005975,GO:0009987,GO:0050794,GO:0052541,GO:0052546,GO:0009507,GO:0015630,GO:0031965,GO:0034399,GO:0042995,GO:0032991,GO:0044430;ID=TraesCS2D02G341200
chr2D	IWGSC_v1.1_201706	gene	436018211	436018534	36	-	.	_Previous_id=TraesCS2D01G341300;Name=TraesCS2D02G341300;_Primconf=HC;_Go=GO:0005199,GO:0016620,GO:0046872,GO:0050661,GO:0051287,GO:0005576,GO:0016021,GO:0031410,GO:0006351,GO:0009567,GO:0010468,GO:0010556,GO:0019219,GO:0031326,GO:0032501,GO:0048856,GO:0080155,GO:2000008;ID=TraesCS2D02G341300
chr2D	IWGSC_v1.1_201706	gene	436361049	436364720	54	+	.	_Previous_id=TraesCS2D01G341400;Name=TraesCS2D02G341400;_Primconf=HC;_Go=GO:0000159,GO:0005730,GO:0005777,GO:0005829,GO:0032991,GO:0008266,GO:0019888,GO:0006555,GO:0006950,GO:0007049,GO:0007165,GO:0009308,GO:0009913,GO:0010090,GO:0019222,GO:0031348,GO:0043687,GO:0046459,GO:0048513,GO:0050790,GO:0090342;ID=TraesCS2D02G341400
chr2D	IWGSC_v1.1_201706	gene	436366117	436368964	62	-	.	_Previous_id=TraesCS2D01G341500;Name=TraesCS2D02G341500;_Primconf=HC;_Go=GO:0000082,GO:0000084,GO:0000085,GO:0000209,GO:0002479,GO:0006521,GO:0006635,GO:0006888,GO:0006915,GO:0006977,GO:0009407,GO:0009640,GO:0009735,GO:0009913,GO:0010090,GO:0000338,GO:0016071,GO:0031145,GO:0042023,GO:0042638,GO:0042981,GO:0043090,GO:0048646,GO:0048767,GO:0051302,GO:0051351,GO:0051352,GO:0051510,GO:0051604,GO:0051…
chr2D	IWGSC_v1.1_201706	gene	436369113	436372717	63	+	.	_Previous_id=TraesCS2D01G341600;Name=TraesCS2D02G341600;_Primconf=HC;_Go=GO:0002098,GO:0003156,GO:0008283,GO:0009294,GO:0009734,GO:0010084,GO:0010468,GO:0010928,GO:0016573,GO:0031323,GO:0034645,GO:0035265,GO:0009987,GO:0048646,GO:0051276,GO:0051604,GO:0080090,GO:2000025,GO:0004402,GO:0051536,GO:0005719,GO:0005829,GO:0008023,GO:0012505,GO:0016020,GO:0033588;ID=TraesCS2D02G341600
chr2D	IWGSC_v1.1_201706	gene	436372814	436381529	62	-	.	_Previous_id=TraesCS2D01G341700;Name=TraesCS2D02G341700;_Primconf=HC;_Go=GO:0000079,GO:0000087,GO:0000278,GO:0007094,GO:0007268,GO:0007276,GO:0009561,GO:0009616,GO:0010267,GO:0019226,GO:0031145,GO:0031915,GO:0032875,GO:0034645,GO:0035196,GO:0043687,GO:0008152,GO:0045773,GO:0050775,GO:0051301,GO:0051302,GO:0051351,GO:0051352,GO:0051510,GO:0051969,GO:0070979,GO:0071156,GO:0090129,GO:0004842,GO:0016…
chr2D	IWGSC_v1.1_201706	gene	437674197	437678833	62	+	.	_Previous_id=TraesCS2D01G341900;Name=TraesCS2D02G341900;_Primconf=HC;_Go=GO:0003707,GO:0004177,GO:0008235,GO:0046872,GO:0005634,GO:0005886,GO:0016021,GO:0006355,GO:0006950,GO:0009653,GO:0010228,GO:0016043,GO:0016070,GO:0043401,GO:0022414,GO:0048513,GO:0048522,GO:0051179;ID=TraesCS2D02G341900
chr2D	IWGSC_v1.1_201706	gene	437679060	437685579	52	-	.	_Previous_id=TraesCS2D01G342000;Name=TraesCS2D02G342000;_Primconf=HC;_Go=GO:0005488,GO:0005886,GO:0044260,GO:0065007,GO:0090304;ID=TraesCS2D02G342000
chr2D	IWGSC_v1.1_201706	gene	437871288	437874311	62	-	.	_Previous_id=TraesCS2D01G342100;Name=TraesCS2D02G342100;_Primconf=HC;_Go=GO:0001968,GO:0005518,GO:0008201,GO:0018454,GO:0045703,GO:0005739,GO:0005783,GO:0016021,GO:0031012,GO:0009790,GO:0010811,GO:0030198,GO:0042761,GO:0048522,GO:0055114;ID=TraesCS2D02G342100
chr2D	IWGSC_v1.1_201706	gene	437898251	437901472	62	-	.	_Previous_id=TraesCS2D01G342200;Name=TraesCS2D02G342200;_Primconf=HC;_Go=GO:0001968,GO:0005518,GO:0008201,GO:0018454,GO:0045703,GO:0005739,GO:0005783,GO:0016021,GO:0031012,GO:0009790,GO:0010811,GO:0030198,GO:0042761,GO:0048522,GO:0055114;ID=TraesCS2D02G342200
chr2D	IWGSC_v1.1_201706	gene	437902221	437910669	58	-	.	_Previous_id=TraesCS2D01G342300;Name=TraesCS2D02G342300;_Primconf=HC;_Go=GO:0005634,GO:0005856,GO:0005938,GO:0016021,GO:0030427,GO:0044422,GO:0044463,GO:1990615,GO:0016740,GO:0016787,GO:0030246,GO:0044237,GO:0044238,GO:0009987,GO:0032502,GO:0048856,GO:0050794,GO:0050896,GO:0071704;ID=TraesCS2D02G342300
chr2D	IWGSC_v1.1_201706	gene	437910898	437912697	51	+	.	_Previous_id=TraesCS2D01G342400;Name=TraesCS2D02G342400;_Primconf=HC;_Go=GO:0002376,GO:0007275,GO:0008152,GO:0016043,GO:0009987,GO:0065007,GO:0038023,GO:0030246,GO:0005886,GO:0016021,GO:0043231;ID=TraesCS2D02G342400
chr2D	IWGSC_v1.1_201706	gene	437947293	437951806	51	+	.	_Previous_id=TraesCS2D01G342500;Name=TraesCS2D02G342500;_Primconf=HC;_Go=GO:0005242,GO:0022839,GO:0005887,GO:0006826,GO:0007155,GO:0008152,GO:0009414,GO:0009651,GO:0009860,GO:0009913,GO:0010014,GO:0010090,GO:0010106,GO:0010167,GO:0015706,GO:0034765,GO:0035295,GO:0045010,GO:0045595,GO:0048513,GO:0048646,GO:0048767,GO:0071555,GO:0071805,GO:0090333;ID=TraesCS2D02G342500
chr2D	IWGSC_v1.1_201706	gene	438247467	438251260	47	+	.	_Previous_id=TraesCS2D01G342600;Name=TraesCS2D02G342600;_Primconf=HC;_Go=GO:0003723,GO:0008270,GO:0016021,GO:0031124,GO:0044248,GO:0044249,GO:0051252;ID=TraesCS2D02G342600
chr2D	IWGSC_v1.1_201706	gene	438702145	438707746	61	+	.	_Previous_id=TraesCS2D01G342700;Name=TraesCS2D02G342700;_Primconf=HC;_Go=GO:0051117,GO:0005654,GO:0005829,GO:0009898,GO:0012506,GO:0019898,GO:0048471,GO:0006807,GO:0006810,GO:0007165,GO:0035265,GO:0043170,GO:0032984,GO:0044237,GO:0044238,GO:0051649;ID=TraesCS2D02G342700
chr2D	IWGSC_v1.1_201706	gene	439434976	439436960	42	-	.	_Previous_id=TraesCS2D01G342800;Name=TraesCS2D02G342800;_Primconf=HC;_Go=GO:0005829,GO:0016226,GO:0044260,GO:0090304,GO:0042803,GO:0051536;ID=TraesCS2D02G342800
chr2D	IWGSC_v1.1_201706	gene	439437120	439439011	56	+	.	_Previous_id=TraesCS2D01G342900;Name=TraesCS2D02G342900;_Primconf=HC;_Go=GO:0003677,GO:0004527,GO:0005643,GO:0016043,GO:0032501,GO:0008152,GO:0065007,GO:0090305;ID=TraesCS2D02G342900
chr2D	IWGSC_v1.1_201706	gene	439440122	439443607	59	-	.	_Previous_id=TraesCS2D01G343000;Name=TraesCS2D02G343000;_Primconf=HC;_Go=GO:0003676,GO:0005634,GO:0005829,GO:0016020,GO:0009788,GO:0009793,GO:0016567,GO:0050896;ID=TraesCS2D02G343000
chr2D	IWGSC_v1.1_201706	gene	439462932	439464720	50	-	.	_Previous_id=TraesCS2D01G343100;Name=TraesCS2D02G343100;_Primconf=HC;_Go=GO:0003677,GO:0016491,GO:0046872,GO:0006464,GO:0009059,GO:0044249,GO:0044281,GO:0050789,GO:0055114,GO:0016021;ID=TraesCS2D02G343100
chr2D	IWGSC_v1.1_201706	gene	439563259	439567583	55	+	.	_Previous_id=TraesCS2D01G343200;Name=TraesCS2D02G343200;_Primconf=HC;_Go=GO:0000981,GO:0003677,GO:0003682,GO:0042802,GO:0005634,GO:0006351,GO:0006357,GO:0006950,GO:0008152,GO:0046907,GO:0048193,GO:0048522,GO:0061025;ID=TraesCS2D02G343200
chr2D	IWGSC_v1.1_201706	gene	439568339	439570022	60	-	.	_Previous_id=TraesCS2D01G343300;Name=TraesCS2D02G343300;_Primconf=HC;_Go=GO:0000070,GO:0000086,GO:0000087,GO:0007091,GO:0007094,GO:0008283,GO:0010389,GO:0016572,GO:0023052,GO:0032435,GO:0042023,GO:0043066,GO:0043161,GO:0043248,GO:0044774,GO:0051301,GO:0051312,GO:0051321,GO:0051329,GO:0051352,GO:0051510,GO:0051788,GO:0071156,GO:0090267,GO:0000778,GO:0000922,GO:0005643,GO:0005815,GO:0005828,GO:0005…
chr2D	IWGSC_v1.1_201706	gene	439693907	439695241	33	+	.	_Previous_id=TraesCS2D01G343400;Name=TraesCS2D02G343400;_Primconf=HC;_Go=GO:0005634,GO:0005694,GO:0005856,GO:0012505,GO:0016020,GO:0042995,GO:0032991,GO:0044422,GO:0044444,GO:0006351,GO:0006955,GO:0009790,GO:0010604,GO:0010720,GO:0023052,GO:0030154,GO:0048513,GO:0051234,GO:0051252,GO:0016788;ID=TraesCS2D02G343400
chr2D	IWGSC_v1.1_201706	gene	439934517	439938004	36	-	.	_Previous_id=TraesCS2D01G343500;Name=TraesCS2D02G343500;_Primconf=HC;_Go=GO:0005634,GO:0005694,GO:0005856,GO:0019005,GO:0032991,GO:0044422,GO:0044444,GO:0032501,GO:0044237,GO:0009987,GO:0032502,GO:0048518,GO:0048856,GO:0050794,GO:0050896,GO:0016787;ID=TraesCS2D02G343500
chr2D	IWGSC_v1.1_201706	gene	439956166	439956480	32	+	.	_Previous_id=TraesCS2D01G343600;Name=TraesCS2D02G343600;_Primconf=HC;_Go=GO:0003723,GO:0003735,GO:0016740,GO:0005829,GO:0005840,GO:0006351,GO:0006355,GO:0006414,GO:0006996,GO:0032501,GO:0032502;ID=TraesCS2D02G343600
chr2D	IWGSC_v1.1_201706	gene	439963220	439964922	43	-	.	_Previous_id=TraesCS2D01G343700;Name=TraesCS2D02G343700;_Primconf=HC;_Go=GO:0006355,GO:0006366,GO:0065003,GO:0070897,GO:0008270,GO:0017025;ID=TraesCS2D02G343700
chr2D	IWGSC_v1.1_201706	gene	439967864	439969157	35	-	.	_Previous_id=TraesCS2D01G343800;Name=TraesCS2D02G343800;_Primconf=HC;_Go=GO:0006355,GO:0032501,GO:0032502,GO:0050896,GO:0070897,GO:0008270,GO:0017025;ID=TraesCS2D02G343800
chr2D	IWGSC_v1.1_201706	gene	440178792	440181066	62	+	.	_Previous_id=TraesCS2D01G343900;Name=TraesCS2D02G343900;_Primconf=HC;_Go=GO:0004298,GO:0005488,GO:0005634,GO:0005886,GO:0019773,GO:0007275,GO:0016043,GO:0043161,GO:0065007;ID=TraesCS2D02G343900
chr2D	IWGSC_v1.1_201706	gene	440310484	440319365	60	+	.	_Previous_id=TraesCS2D01G344000;Name=TraesCS2D02G344000;_Primconf=HC;_Go=GO:0000405,GO:0005524,GO:0043140,GO:0000733,GO:0006260,GO:0006281,GO:0006306,GO:0006310,GO:0007275,GO:0008283,GO:0009154,GO:0009207,GO:0032508,GO:0040029,GO:0042631,GO:0046034,GO:0046130,GO:0051567,GO:0005634,GO:0005694,GO:0005737;ID=TraesCS2D02G344000
chr2D	IWGSC_v1.1_201706	gene	440321421	440326178	61	+	.	_Previous_id=TraesCS2D01G344100;Name=TraesCS2D02G344100;_Primconf=HC;_Go=GO:0004601,GO:0009887,GO:0031323,GO:0034645,GO:0048522,GO:0051716,GO:0055114,GO:0080090,GO:0090304;ID=TraesCS2D02G344100
chr2D	IWGSC_v1.1_201706	gene	440325740	440328360	60	-	.	_Previous_id=TraesCS2D01G344200;Name=TraesCS2D02G344200;_Primconf=HC;_Go=GO:0004474,GO:0006097,GO:0006099,GO:0007275,GO:0046356,GO:0009514,GO:0016020;ID=TraesCS2D02G344200
chr2D	IWGSC_v1.1_201706	gene	440587891	440591037	58	+	.	_Previous_id=TraesCS2D01G344300;Name=TraesCS2D02G344300;_Primconf=HC;_Go=GO:0004252,GO:0016874,GO:0005794,GO:0016021,GO:0006508,GO:0007165,GO:0031323,GO:0042221,GO:0044260,GO:0048513,GO:0048518,GO:0048519,GO:0051179;ID=TraesCS2D02G344300
chr2D	IWGSC_v1.1_201706	gene	440591074	440591751	31	-	.	_Previous_id=TraesCS2D01G344400;Name=TraesCS2D02G344400;_Primconf=HC;_Go=GO:0005737,GO:0016021,GO:0032501,GO:0035556,GO:0044237,GO:0044238,GO:0016301,GO:0016773,GO:0046872;ID=TraesCS2D02G344400
chr2D	IWGSC_v1.1_201706	gene	440608079	440611717	63	+	.	_Previous_id=TraesCS2D01G344500;Name=TraesCS2D02G344500;_Primconf=HC;_Go=GO:0000139,GO:0005768,GO:0005802,GO:0005886,GO:0016021,GO:0019005,GO:0006869,GO:0009061,GO:0009855,GO:0009944,GO:0010014,GO:0010075,GO:0030162,GO:0006511,GO:0043161,GO:0048513,GO:0048646,GO:2000026,GO:0031625;ID=TraesCS2D02G344500
chr2D	IWGSC_v1.1_201706	gene	440633947	440634603	50	+	.	_Previous_id=TraesCS2D01G344600;Name=TraesCS2D02G344600;_Primconf=HC;_Go=GO:0009987,GO:0048513,GO:0050896;ID=TraesCS2D02G344600
chr2D	IWGSC_v1.1_201706	gene	440768135	440768914	43	+	.	_Previous_id=TraesCS2D01G344700;Name=TraesCS2D02G344700;_Primconf=HC;_Go=GO:0004672,GO:0005524,GO:0006468,GO:0007165,GO:0007275,GO:0016021;ID=TraesCS2D02G344700
chr2D	IWGSC_v1.1_201706	gene	440772568	440778627	59	-	.	_Previous_id=TraesCS2D01G344800;Name=TraesCS2D02G344800;_Primconf=HC;_Go=GO:0000418,GO:0005665,GO:0005666,GO:0005736,GO:0032991,GO:0003677,GO:0003899,GO:0006366,GO:0006626,GO:0009307,GO:0009792,GO:0040035,GO:0008152,GO:0051604,GO:0065007,GO:0090305;ID=TraesCS2D02G344800
chr2D	IWGSC_v1.1_201706	gene	440781102	440784137	53	-	.	_Previous_id=TraesCS2D01G344900;Name=TraesCS2D02G344900;_Primconf=HC;_Go=GO:0000418,GO:0005665,GO:0005666,GO:0005736,GO:0032991,GO:0003677,GO:0003899,GO:0006366,GO:0006468,GO:0006626,GO:0009307,GO:0008152,GO:0051604,GO:0065007;ID=TraesCS2D02G344900
chr2D	IWGSC_v1.1_201706	gene	440966303	440969037	51	-	.	_Previous_id=TraesCS2D01G345000;Name=TraesCS2D02G345000;_Primconf=HC;_Go=GO:0000418,GO:0005665,GO:0005666,GO:0005736,GO:0032991,GO:0003677,GO:0003899,GO:0006366,GO:0006468,GO:0006626,GO:0009307,GO:0008152,GO:0051604,GO:0065007;ID=TraesCS2D02G345000
chr2D	IWGSC_v1.1_201706	gene	441080753	441081175	32	+	.	_Previous_id=TraesCS2D01G345100;Name=TraesCS2D02G345100;_Primconf=HC;_Go=GO:0005780,GO:0006950,GO:0007031,GO:0007165,GO:0032501,GO:0042221,GO:0043549,GO:0043687,GO:0044249,GO:0048519,GO:0051234,GO:0090304,GO:0008121,GO:0009055,GO:0016301,GO:0016782,GO:0030674;ID=TraesCS2D02G345100
chr2D	IWGSC_v1.1_201706	gene	441525838	441529399	35	+	.	_Previous_id=TraesCS2D01G345200;Name=TraesCS2D02G345200;_Primconf=HC;_Go=GO:0000956,GO:0006468,GO:0007346,GO:0009887,GO:0009888,GO:0010468,GO:0010638,GO:0023052,GO:0033044,GO:0043687,GO:0008152,GO:0050896,GO:0051301,GO:0004693,GO:0005524,GO:0005634,GO:0005829;ID=TraesCS2D02G345200
chr2D	IWGSC_v1.1_201706	gene	441537259	441543425	53	+	.	_Previous_id=TraesCS2D01G345300;Name=TraesCS2D02G345300;_Primconf=HC;_Go=GO:0000775,GO:0000790,GO:0000792,GO:0000798,GO:0005737,GO:0009579,GO:0000279,GO:0006302,GO:0007062,GO:0032501,GO:0022414,GO:0032502,GO:0048285,GO:0065007,GO:0003676,GO:0003682,GO:0016740;ID=TraesCS2D02G345300
chr2D	IWGSC_v1.1_201706	gene	441564062	441565397	62	+	.	_Previous_id=TraesCS2D01G345400;Name=TraesCS2D02G345400;_Primconf=HC;_Go=GO:0005634,GO:0005768,GO:0005802,GO:0016021,GO:0007165,GO:0009058,GO:0042221,GO:0043687,GO:0051179;ID=TraesCS2D02G345400
chr2D	IWGSC_v1.1_201706	gene	441571906	441573483	40	+	.	_Derived_from=TraesCS2D01G345600,PPRFinder_499;Name=TraesCS2D02G345600;_Primconf=HC;_Go=GO:0003723,GO:0004519,GO:0008270,GO:0005739,GO:0009507,GO:0007062,GO:0007129,GO:0007131,GO:0009451,GO:0009887,GO:0009888,GO:0010638,GO:0033044,GO:0042138,GO:0051327;_Curating_team=IWGSC_steinn;_Manually_curated=yes;ID=TraesCS2D02G345600
chr2D	IWGSC_v1.1_201706	gene	441574002	441576219	52	-	.	_Previous_id=TraesCS2D01G345700;Name=TraesCS2D02G345700;_Primconf=HC;_Go=GO:0009908,GO:0009911,GO:0010119,GO:0044238,GO:0044260,GO:0009987,GO:0048573,GO:0005634,GO:0005739,GO:0005773,GO:0005783,GO:0016020,GO:0031975,GO:0042995,GO:0044422,GO:0008429,GO:0016787;ID=TraesCS2D02G345700
chr2D	IWGSC_v1.1_201706	gene	441761733	441766106	54	-	.	_Derived_from=TraesCS2D01G345800,PPRFinder_500;Name=TraesCS2D02G345800;_Primconf=HC;_Go=GO:0000023,GO:0000966,GO:0006655,GO:0009451,GO:0009664,GO:0009793,GO:0009902,GO:0010027,GO:0010075,GO:0010228,GO:0019252,GO:0019288,GO:0046777,GO:0048445,GO:0048481,GO:0048563,GO:0090305,GO:0003723,GO:0004519,GO:0005739,GO:0009507,GO:0016021;_Curating_team=IWGSC_steinn;_Manually_curated=yes;ID=TraesCS2D02G3458…
chr2D	IWGSC_v1.1_201706	gene	441766394	441770810	48	+	.	_Previous_id=TraesCS2D01G345900;Name=TraesCS2D02G345900;_Primconf=HC;_Go=GO:0003824,GO:0009507,GO:0016021,GO:0010196,GO:0043170,GO:0044237,GO:0044238;ID=TraesCS2D02G345900
chr2D	IWGSC_v1.1_201706	gene	442137648	442154628	61	-	.	_Previous_id=TraesCS2D01G346000;Name=TraesCS2D02G346000;_Primconf=HC;_Go=GO:0000272,GO:0006635,GO:0016558,GO:0004806,GO:0016021;ID=TraesCS2D02G346000
chr2D	IWGSC_v1.1_201706	gene	442976861	442980543	61	+	.	_Previous_id=TraesCS2D01G346100;Name=TraesCS2D02G346100;_Primconf=HC;_Go=GO:0000151,GO:0009507,GO:0032991,GO:0004842,GO:0016881,GO:0016567,GO:0042221,GO:0043687,GO:0008152;ID=TraesCS2D02G346100
chr2D	IWGSC_v1.1_201706	gene	442982365	442989371	62	+	.	_Previous_id=TraesCS2D01G346200;Name=TraesCS2D02G346200;_Primconf=HC;_Go=GO:0004729,GO:0005739,GO:0009941,GO:0006782,GO:0009851,GO:0010229,GO:0043170,GO:0044238,GO:0048513,GO:0048825,GO:0055114;ID=TraesCS2D02G346200
chr2D	IWGSC_v1.1_201706	gene	443235092	443242263	63	+	.	_Previous_id=TraesCS2D01G346300;Name=TraesCS2D02G346300;_Primconf=HC;_Go=GO:0005737,GO:0005856,GO:0016328,GO:0042995,GO:0045178,GO:0098590,GO:0007165,GO:0007275,GO:0043170,GO:0044237,GO:0044238,GO:0065008,GO:0008092,GO:0016787;ID=TraesCS2D02G346300
chr2D	IWGSC_v1.1_201706	gene	443242402	443246951	60	-	.	_Previous_id=TraesCS2D01G346400;Name=TraesCS2D02G346400;_Primconf=HC;_Go=GO:0043023,GO:0005739,GO:0006412,GO:0006950,GO:0008152,GO:0051704;ID=TraesCS2D02G346400
chr2D	IWGSC_v1.1_201706	gene	443483706	443485936	.	-	.	_Derived_from=TraesCS2D01G346500,maker-chr2D-exonerate_est2genome-gene-1478.1;Name=TraesCS2D02G346500;Note=TaAAP2.D paralogue;_Go=GO:0003333,GO:0006612,GO:0006833,GO:0006862,GO:0006888,GO:0009651,GO:0009750,GO:0009963,GO:0010363,GO:0015696,GO:0015698,GO:0015800,GO:0015802,GO:0015804,GO:0015837,GO:0030003,GO:0031328,GO:0043069,GO:0043090,GO:0043269,GO:0061025,GO:0070838,GO:1900378,GO:2000762,GO:00…
